# Supplementary material for: Reactivity patterns of thermally stable, terminal, electrophilic phosphinidene complexes towards diazoalkanes: oxidation at the phosphorus centre and formation of P-bound η1-phosphaazine, η1-phosphaalkene and η3-diazaphosphaallene complexes
Source: Royal Society of Chemistry journal article supplement (doi:10.1039/b512375e), 2005-01-01
Supplement: b512375e.pdf [file b512375e.pdf]

Supplementary Material (ESI) for Chemical Communications  
This journal is © The Royal Society of Chemistry 2005

**Reactivity Patterns of Thermally Stable Terminal,  
Electrophilic Phosphinidene Complexes Towards  
Diazoalkanes: Oxidation at the Phosphorus Centre and  
Formation of P-bound  $\eta^1$ -Phosphaimine,  $\eta^1$ -Phosphaalkene  
and  $\eta^3$ -Phosphaallene Complexes.**

Todd W. Graham, Konstantin A. Udachin and Arthur J. Carty\*

Steacie Institute for Molecular Sciences, National Research Council of Canada, 100  
Sussex Drive, Ottawa, Ontario, Canada K1A 0R6 and The Ottawa-Carleton Chemistry  
Institute, University of Ottawa, Ottawa, Ontario, Canada K1N 6N5

## Experimental

**General comments:** All procedures were carried out using standard Schlenk techniques or in an Innovative Technologies glovebox under a nitrogen atmosphere. THF was distilled from Na/benzophenone. Dichloromethane and hexane were purified using solvent purification columns containing alumina (dichloromethane) or alumina and copper catalyst (hexane).  $\text{CDCl}_3$  and  $\text{CD}_2\text{Cl}_2$  were vacuum distilled from  $\text{AlCl}_3$  and then  $\text{CaH}_2$ .  $\text{C}_6\text{D}_6$  was vacuum distilled from Na/benzophenone. NMR spectra were recorded at 400 MHz ( $^1\text{H}$ ) or 161.975 ( $^{31}\text{P}\{^1\text{H}\}$ ).  $\text{Cl}_2\text{PN}^i\text{Pr}_2^1$  and  $\text{Ph}_2\text{C}=\text{N}=\text{N}^2$  were prepared according to the literature procedures.  $\text{M}(\text{CO})_6$  (M = Cr, Mo, W) and  $[\text{Cp}^\dagger\text{Fe}(\text{CO})_2]_2$  ( $\text{Cp}^\dagger = \text{Cp}, \text{Cp}^*$ ) were obtained from Strem Chemicals and were used as received. All other reagents were obtained from Aldrich and were used as received.

a)  $[\text{CpFe}(\text{CO})_2(\text{PN}^i\text{Pr}_2)]\text{AlCl}_4$  (**1**). Note that although this compound may be typically prepared and used *in situ* by the addition of  $\text{CH}_2\text{Cl}_2$  to equimolar amounts of  $[\text{CpFe}(\text{CO})_2\{\text{P}(\text{Cl})\text{N}^i\text{Pr}_2\}]$  and  $\text{AlCl}_3$ , spectroscopically pure material was prepared as follows: 1 mL of  $\text{CHCl}_3$  was added to a mixture of 83 mg (0.622 mmol) of  $\text{AlCl}_3$  and 200 mg (0.582 mmol) of  $[\text{CpFe}(\text{CO})_2\{\text{P}(\text{Cl})\text{N}^i\text{Pr}_2\}]$  and the mixture was stirred for 5 min. resulting in the formation of a viscous suspension. The mixture was filtered through Celite and the crystalline yellow solid was washed with a small amount of  $\text{CHCl}_3$ .  $\text{CH}_2\text{Cl}_2$  was then added to the filter until the solid was dissolved (*ca.* 2 mL); the solution was filtered and then ether was added until a slight cloudiness appeared. Cooling to  $-45$  °C overnight resulted in the formation of a highly crystalline solid which was dried *in vacuo*. Yield: 67 %.  $^1\text{H}$  NMR ( $\delta$ ,  $\text{CD}_2\text{Cl}_2$ , 25 °C): 5.70 (s, 5H,  $\text{C}_5\text{H}_5$ ); 4.96 (br s, 1H,  $\text{CH}(\text{CH}_3)_2$ ); 4.65 (br s, 1H,  $\text{CH}(\text{CH}_3)_2$ ); 1.61 (br s, 6H,  $\text{CH}(\text{CH}_3)_2$ ); 1.50 (br s, 6H,  $\text{CH}(\text{CH}_3)_2$ ).  $^{31}\text{P}$  NMR ( $\delta$ ,  $\text{CD}_2\text{Cl}_2$ , 25 °C): 922. IR ( $\nu_{\text{CO}}$ ,  $\text{cm}^{-1}$ ,  $\text{CH}_2\text{Cl}_2$ ): 2074 (s); 2036 (s). This compound is extremely air-sensitive and correct elemental analysis could not be obtained. Mass spectrum: Calcd.  $\text{M}^+$   $m/z = 308.1$ ; found  $m/z = 308.2$ .

b)  $[\text{CpFe}(\text{CO})_2\{\text{P}(\text{Cl})\text{N}^i\text{Pr}_2\}]$  (**6**). 150 mg of Na/K (74 wt% K) was added to a vigorously stirred solution of 500 mg (1.413 mmol) of  $[\text{CpFe}(\text{CO})_2]_2$  in 20 mL of THF. The mixture was stirred for 3h, filtered through Celite and was then added *via* cannula to a solution of 630 mg (3.118 mmol) of  $\text{Cl}_2\text{PN}^i\text{Pr}_2$  in 20 mL of THF. After warming to

room temperature and stirring for 30 min., the solvent was removed *in vacuo* and the residue was extracted with pentane until the extracts were almost colorless. The extracts were filtered through Celite and concentrated *in vacuo* until precipitation occurred. After cooling to  $-45\text{ }^{\circ}\text{C}$  overnight the solvent was decanted and the crystalline solid was dried *in vacuo*. Yield: 54 %.  $^1\text{H}$  NMR ( $\delta$ ,  $\text{CDCl}_3$ ,  $25\text{ }^{\circ}\text{C}$ ): 4.93 (s, 5H,  $\text{C}_5\text{H}_5$ ); 3.79 (br s, 2H,  $\text{CH}(\text{CH}_3)_2$ ); 1.27 (br s, 12H,  $\text{CH}(\text{CH}_3)_2$ ).  $^{31}\text{P}$  NMR ( $\delta$ ,  $\text{CDCl}_3$ ,  $25\text{ }^{\circ}\text{C}$ ): 321. IR ( $\nu_{\text{CO}}$ ,  $\text{cm}^{-1}$ ,  $\text{CH}_2\text{Cl}_2$ ): 2019 (s); 1970 (s). Anal. Calcd. for  $\text{C}_{13}\text{H}_{19}\text{ClINO}_2\text{PFe}$ : C, 45.5; H, 5.6; N, 4.1. Found: C, 45.8; H, 5.9; N, 3.9.

c)  $[\text{CpFe}(\text{CO})_2(\eta^1\text{-P}(\text{N}^i\text{Pr}_2)=\text{N-N}(\text{=CPh})_2)]\text{AlCl}_4$  (7). 61 mg (0.314 mmol) of  $\text{Ph}_2\text{C}=\text{N}=\text{N}$  was added to a suspension of 149 mg (0.312 mmol) of  $[\text{CpFe}(\text{CO})_2(\eta^1\text{-PN}^i\text{Pr}_2)]\text{AlCl}_4$  in *ca.* 1 mL of  $\text{CH}_2\text{Cl}_2$  at  $-45\text{ }^{\circ}\text{C}$ . The mixture was shaken vigorously and then was allowed to stand at room temperature, resulting in the formation of an orange crystalline solid over 30 min. The solvent was decanted and the solid was dried *in vacuo*. Yield: 78 %.  $^1\text{H}$  NMR ( $\delta$ ,  $\text{CDCl}_3$ ,  $25\text{ }^{\circ}\text{C}$ ): 7.67-7.65 (m, 20H,  $\text{C}_6\text{H}_5$ ); 5.71 (s, 5H,  $\text{C}_5\text{H}_5$ ); 5.35 (s, 2H,  $\text{CH}_2\text{Cl}_2$ ); 3.99 (sept.,  $^3\text{J}_{\text{HH}} = 6.5\text{ Hz}$ , 2H,  $\text{CH}(\text{CH}_3)_2$ ); 1.27 (d,  $^3\text{J}_{\text{HH}} = 6.5\text{ Hz}$ , 12H,  $\text{CH}(\text{CH}_3)_2$ ).  $^{31}\text{P}$  NMR ( $\delta$ ,  $\text{CDCl}_3$ ,  $25\text{ }^{\circ}\text{C}$ ): 291. IR ( $\nu_{\text{CO}}$ ,  $\text{cm}^{-1}$ ,  $\text{CH}_2\text{Cl}_2$ ): 2071 (s); 2032 (s). Anal. Calcd. for  $\text{C}_{26}\text{H}_{29}\text{AlCl}_4\text{N}_3\text{O}_2\text{PFe}\cdot\text{CH}_2\text{Cl}_2$  (note that one equivalent of co-crystallized  $\text{CH}_2\text{Cl}_2$  was shown to be present *via* X-ray crystallography): C, 42.9; H, 4.1; N, 5.6. Found: 42.6; H, 4.3; N, 5.6.

d)  $[\text{Cp}^*\text{Fe}(\text{CO})_2(\eta^1\text{-P}(\text{N}^i\text{Pr}_2)=\text{N-N}(\text{=CPh})_2)]\text{AlCl}_4$  (8). 36 mg (0.270 mmol) of  $\text{AlCl}_3$  was 100 mg (0.242 mmol) of  $[\text{Cp}^*\text{Fe}(\text{CO})_2\{\text{P}(\text{Cl})\text{N}^i\text{Pr}_2\}]$  and then 0.5 mL of  $\text{CH}_2\text{Cl}_2$  was added. The mixture was cooled to  $-45\text{ }^{\circ}\text{C}$  and then a cold solution of 47 mg (0.241 mmol) of  $\text{Ph}_2\text{C}=\text{N}=\text{N}$  in 0.5 mL of  $\text{CH}_2\text{Cl}_2$  was added. After stirring for 15 min. ether was added until the solution became slightly cloudy and then the mixture was then cooled to  $-45\text{ }^{\circ}\text{C}$  overnight. The solvent was decanted from the orange solid, which was then dried *in vacuo*. Yield: 85 %.  $^1\text{H}$  NMR ( $\delta$ ,  $\text{CD}_2\text{Cl}_2$ ,  $25\text{ }^{\circ}\text{C}$ ): 7.71-7.18 (m, 20H,  $\text{C}_6\text{H}_5$ ); 3.86 (sept.,  $^3\text{J}_{\text{HH}} = 6.6\text{ Hz}$ , 2H,  $\text{CH}(\text{CH}_3)_2$ ); 2.10 (s, 15H,  $\text{C}_5\text{Me}_5$ ); 1.27 (d,  $^3\text{J}_{\text{HH}}=6.6\text{ Hz}$ , 12H,  $\text{CH}(\text{CH}_3)_2$ ).  $^{31}\text{P}$  NMR ( $\delta$ ,  $\text{CD}_2\text{Cl}_2$ ,  $25\text{ }^{\circ}\text{C}$ ): 309. IR ( $\nu_{\text{CO}}$ ,  $\text{cm}^{-1}$ ,  $\text{CH}_2\text{Cl}_2$ ): 2051 (s); 2008 (s). Anal. Calcd. for  $\text{C}_{31}\text{H}_{39}\text{AlCl}_4\text{N}_3\text{O}_2\text{PFe}$ : C, 50.2; H, 5.3; N, 5.7. Found: C, 50.6; H, 5.3; N, 5.3.

e)  $[\text{CpFe}(\text{CO})_2(\eta^1\text{-P}(\text{N}^i\text{Pr}_2)=\text{CH}(\text{SiMe}_3))\text{AlCl}_4$  (**9**). 170  $\mu\text{L}$  (2.0 M in hexane, 0.340 mmol) of  $\text{Me}_3\text{SiCHN}_2$  was added at  $-45\text{ }^\circ\text{C}$  to a solution of 162 mg (0.340 mmol) of  $[\text{CpFe}(\text{CO})_2(\eta^1\text{-PN}^i\text{Pr}_2)]\text{AlCl}_4$  in 1 mL of  $\text{CH}_2\text{Cl}_2$  resulting in immediate gas evolution. The mixture was warmed to room temperature, stirred for 10 min. and then pentane was added until the solution became slightly cloudy. After cooling to  $-45\text{ }^\circ\text{C}$  overnight the solvent was decanted and the crystalline orange solid was dried *in vacuo*. Yield: 60 %.  $^1\text{H}$  NMR ( $\delta$ ,  $\text{CDCl}_3$ ,  $25\text{ }^\circ\text{C}$ ): 6.43 (d,  $^2J_{\text{PH}}=36.8\text{ Hz}$ , 1H,  $\text{CHSiMe}_3$ ); 5.60 (s, 5H,  $\text{C}_5\text{H}_5$ ); 3.92 (sept.,  $^3J_{\text{HH}}=6.6\text{ Hz}$ , 2H,  $\text{CH}(\text{CH}_3)_2$ ); 1.43 (d,  $^3J_{\text{HH}}=6.6\text{ Hz}$ ,  $\text{CH}(\text{CH}_3)_2$ ); 0.27 (s, 9H,  $\text{SiMe}_3$ ).  $^{31}\text{P}$  NMR ( $\delta$ ,  $\text{CDCl}_3$ ,  $25\text{ }^\circ\text{C}$ ): 242. IR ( $\nu_{\text{CO}}$ ,  $\text{cm}^{-1}$ ,  $\text{CH}_2\text{Cl}_2$ ): 2066 (s); 2027 (s). Anal. Calcd. for  $\text{C}_{17}\text{H}_{29}\text{AlCl}_4\text{NO}_2\text{PSiFe}$ : C, 36.3; H, 5.2; N, 2.5. Found: C, 35.9; H, 5.5; N, 2.5.

f)  $[\text{Cp}^*\text{M}(\text{CO})_2(\eta^3\text{-P}(\text{N}^i\text{Pr}_2)\text{NN}(\text{CPh})_2)\text{AlCl}_4$ . (M = Cr (**13**); Mo (**14**), W (**15**) were prepared analogously as follows). 60 mg of  $\text{AlCl}_3$  (0.500 mmol) was added to 200 mg (0.415 mmol) of  $[\text{Cp}^*\text{Mo}(\text{CO})_3(\eta^1\text{-P}(\text{Cl})\text{N}^i\text{Pr}_2)]$  in 5 mL of  $\text{CH}_2\text{Cl}_2$ . The solution was cooled to  $-45\text{ }^\circ\text{C}$  and then a cold  $\text{CH}_2\text{Cl}_2$  solution of 81 mg (0.415 mmol)  $\text{Ph}_2\text{C}=\text{N}=\text{N}$  was added. After stirring for 30 min. at room temperature the solvent was removed *in vacuo* and the solid was then triturated in pentane overnight. The pentane was decanted and the red solid was dried *in vacuo*. **13**: Yield 60 %.  $^1\text{H}$  NMR ( $\delta$ ,  $\text{CDCl}_3$ ,  $-30\text{ }^\circ\text{C}$ ): 7.68-7.32 (m, 20H,  $\text{C}_6\text{H}_5$ ); 4.04 (sept.,  $^3J_{\text{HH}} = 6.7\text{ Hz}$ , 1H,  $\text{CH}(\text{CH}_3)_2$ ); 3.62 (sept.,  $^3J_{\text{HH}} = 6.8\text{ Hz}$ , 1H,  $\text{CH}(\text{CH}_3)_2$ ); 1.73 (s, 15H,  $\text{C}_5\text{Me}_5$ ); 1.51 (d,  $^3J_{\text{HH}} = 6.7\text{ Hz}$ , 3H,  $\text{CH}(\text{CH}_3)_2$ ), 1.31 (d,  $^3J_{\text{HH}} = 6.8\text{ Hz}$ , 3H,  $\text{CH}(\text{CH}_3)_2$ ), 1.28 (d,  $^3J_{\text{HH}} = 6.7\text{ Hz}$ , 3H,  $\text{CH}(\text{CH}_3)_2$ ), 1.17 (d,  $^3J_{\text{HH}} = 6.7\text{ Hz}$ , 3H,  $\text{CH}(\text{CH}_3)_2$ ).  $^{31}\text{P}$  NMR ( $\delta$ ,  $\text{CDCl}_3$ ,  $25\text{ }^\circ\text{C}$ ): 195. IR ( $\nu_{\text{CO}}$ ,  $\text{cm}^{-1}$ ,  $\text{CH}_2\text{Cl}_2$ ): 1978 (s); 1917 (s). This compound is extremely air-sensitive and correct elemental analysis could not be obtained. Mass spectrum: Calcd.  $\text{M}^+$   $m/z = 568.6$ ; found  $m/z = 568.4$ . **14**: Yield 68 %.  $^1\text{H}$  NMR ( $\delta$ ,  $\text{CDCl}_3$ ,  $-30\text{ }^\circ\text{C}$ ): 7.68-7.28 (m, 20H,  $\text{C}_6\text{H}_5$ ); 3.72 (sept.,  $^3J_{\text{HH}}=7.0\text{ Hz}$ , 2H,  $\text{CH}(\text{CH}_3)_2$ ); 1.90 (s, 15H,  $\text{C}_5\text{Me}_5$ ); 1.28 (d,  $^3J_{\text{HH}}=7.0\text{ Hz}$ , 12H,  $\text{CH}(\text{CH}_3)_2$ ).  $^{31}\text{P}$  NMR ( $\delta$ ,  $\text{CDCl}_3$ ,  $25\text{ }^\circ\text{C}$ ): 152. IR ( $\nu_{\text{CO}}$ ,  $\text{cm}^{-1}$ ,  $\text{CH}_2\text{Cl}_2$ ): 1984 (s); 1919 (s). Anal. Calcd. for  $\text{C}_{31}\text{H}_{39}\text{AlCl}_4\text{N}_3\text{O}_2\text{PMo}$ : C, 47.7; H, 5.0; N, 5.4. Found: C, 47.3; H, 5.3; N, 5.1. **15**: Note that X-ray quality crystals were obtained from a  $\text{CH}_2\text{Cl}_2$ /pentane mixture at  $-45\text{ }^\circ\text{C}$ . Yield: 66 %.  $^1\text{H}$  NMR ( $\delta$ ,  $\text{CDCl}_3$ ,  $-30\text{ }^\circ\text{C}$ ): 7.72-7.28 (m, 20H,

Supplementary Material (ESI) for Chemical Communications  
This journal is © The Royal Society of Chemistry 2005

$C_6H_5$ ); 3.65 (sept,  $^3J_{HH}=6.7$  Hz, 2H,  $CH(CH_3)_2$ ); 2.02 (s, 15H,  $C_5Me_5$ ); 1.28 (d,  $^3J_{HH}=6.7$  Hz, 12H,  $CH(CH_3)_2$ ).  $^{31}P$  NMR ( $\delta$ ,  $CDCl_3$ , 25 °C): 125. IR ( $\nu_{CO}$ ,  $cm^{-1}$ ,  $CH_2Cl_2$ ): 1975 (s); 1918 (s). Anal. Calcd. for  $C_{31}H_{39}AlCl_4N_3O_2PW$ : C, 40.2; H, 4.4; N, 4.4. Found: C, 40.1; H, 4.4; N, 4.3.

## References

1. R. B. King, N. D. Sadanani *Synth. React. Inorg. Met.-Org. Chem.* **1985**, *15*(2), 149.
2. L. I. Smith, K. L. Howard *Organic Syntheses* **1955**, 351.

Crystallographic data for compounds **7**, **9** and **15**.

Table 1. Atomic coordinates ( $\times 10^4$ ) and equivalent isotropic displacement parameters ( $\text{\AA}^2 \times 10^3$ ) for  $[\text{CpFe}(\text{CO})_2(\eta^1\text{-P}(\text{N}^i\text{Pr}_2)=\text{N}-\text{N}(\text{=CPh})_2)]\text{AlCl}_4$  (**7**).  $U(\text{eq})$  is defined as one third of the trace of the orthogonalized  $U^{ij}$  tensor.

|       | x        | y       | z       | U(eq) |
|-------|----------|---------|---------|-------|
| Fe(1) | 1025(1)  | 4845(1) | 3341(1) | 17(1) |
| Cl(1) | -578(1)  | 2988(1) | 5029(1) | 42(1) |
| Cl(2) | 2759(1)  | 2574(1) | 5434(1) | 38(1) |
| Cl(3) | 468(1)   | 1331(1) | 5966(1) | 42(1) |
| Cl(4) | 1050(1)  | 3099(1) | 6787(1) | 28(1) |
| P(1)  | -285(1)  | 5214(1) | 2388(1) | 15(1) |
| Al(1) | 930(1)   | 2494(1) | 5796(1) | 23(1) |
| O(1)  | -910(1)  | 5147(1) | 4274(1) | 32(1) |
| O(2)  | 2330(1)  | 6314(1) | 3708(1) | 32(1) |
| N(1)  | 97(1)    | 5758(1) | 1758(1) | 16(1) |
| N(2)  | -1734(1) | 4924(1) | 2161(1) | 20(1) |
| N(3)  | -2212(1) | 4488(1) | 2685(1) | 21(1) |
| C(1)  | -191(1)  | 5038(1) | 3896(1) | 23(1) |
| C(2)  | 1813(1)  | 5752(1) | 3557(1) | 22(1) |
| C(8)  | 1476(1)  | 6022(1) | 1798(1) | 20(1) |
| C(9)  | 2060(2)  | 5739(1) | 1157(1) | 29(1) |
| C(10) | 1590(2)  | 6887(1) | 1892(1) | 28(1) |
| C(11) | -859(1)  | 6033(1) | 1123(1) | 19(1) |
| C(12) | -1950(2) | 6512(1) | 1348(1) | 26(1) |
| C(13) | -1380(1) | 5388(1) | 618(1)  | 25(1) |
| C(14) | -3169(1) | 4039(1) | 2424(1) | 19(1) |
| C(15) | -3812(1) | 3596(1) | 2936(1) | 21(1) |
| C(16) | -4831(1) | 3091(1) | 2682(1) | 25(1) |
| C(17) | -5460(2) | 2687(1) | 3164(1) | 31(1) |
| C(18) | -5083(2) | 2784(1) | 3890(1) | 33(1) |
| C(19) | -4063(2) | 3277(1) | 4148(1) | 32(1) |
| C(20) | -3427(1) | 3678(1) | 3675(1) | 27(1) |
| C(21) | -3642(1) | 3955(1) | 1643(1) | 21(1) |

Supplementary Material (ESI) for Chemical Communications  
This journal is © The Royal Society of Chemistry 2005

|        |          |         |         |       |
|--------|----------|---------|---------|-------|
| C(22)  | -2999(2) | 3477(1) | 1231(1) | 31(1) |
| C(23)  | -3443(2) | 3412(1) | 498(1)  | 39(1) |
| C(24)  | -4518(2) | 3817(1) | 183(1)  | 39(1) |
| C(25)  | -5171(2) | 4288(1) | 589(1)  | 38(1) |
| C(26)  | -4740(1) | 4358(1) | 1321(1) | 29(1) |
| C(3)   | 1005(1)  | 3747(1) | 2864(1) | 35(1) |
| C(4)   | 915(1)   | 3677(1) | 3600(1) | 38(1) |
| C(5)   | 2050(1)  | 4015(1) | 4003(1) | 47(1) |
| C(6)   | 2842(1)  | 4294(1) | 3515(1) | 53(1) |
| C(7)   | 2196(1)  | 4129(1) | 2811(1) | 41(1) |
| C(3A)  | 971(1)   | 3695(1) | 2953(1) | 35(1) |
| C(4A)  | 1355(1)  | 3756(1) | 3706(1) | 38(1) |
| C(5A)  | 2562(1)  | 4158(1) | 3840(1) | 47(1) |
| C(6A)  | 2925(1)  | 4346(1) | 3171(1) | 53(1) |
| C(7A)  | 1942(1)  | 4059(1) | 2622(1) | 41(1) |
| Cl(1S) | -4503(1) | 5563(1) | 4319(1) | 42(1) |
| Cl(2S) | -5149(1) | 5830(1) | 2777(1) | 47(1) |
| C(1S)  | -3895(2) | 5782(1) | 3528(1) | 37(1) |

---

Table 2. Bond lengths [Å] and angles [°] for [CpFe(CO)<sub>2</sub>(η<sup>1</sup>-P(N<sup>t</sup>Pr<sub>2</sub>)=N-N(=CPh)<sub>2</sub>)]AlCl<sub>4</sub> (7).

---

|             |            |
|-------------|------------|
| Fe(1)-C(2)  | 1.7970(14) |
| Fe(1)-C(1)  | 1.8002(15) |
| Fe(1)-C(4A) | 2.0325     |
| Fe(1)-C(5)  | 2.0876     |
| Fe(1)-C(6)  | 2.0908     |
| Fe(1)-C(5A) | 2.0909     |
| Fe(1)-C(4)  | 2.1043     |
| Fe(1)-C(7)  | 2.1094     |
| Fe(1)-C(3)  | 2.1177     |
| Fe(1)-C(3A) | 2.1353     |
| Fe(1)-P(1)  | 2.1691(4)  |
| Fe(1)-C(6A) | 2.2246     |
| Cl(1)-Al(1) | 2.1324(6)  |
| Cl(2)-Al(1) | 2.1236(6)  |
| Cl(3)-Al(1) | 2.1217(6)  |
| Cl(4)-Al(1) | 2.1400(5)  |
| P(1)-N(2)   | 1.5748(11) |
| P(1)-N(1)   | 1.6237(11) |
| O(1)-C(1)   | 1.1316(18) |
| O(2)-C(2)   | 1.1312(18) |
| N(1)-C(8)   | 1.4911(16) |
| N(1)-C(11)  | 1.5053(16) |
| N(2)-N(3)   | 1.4033(15) |
| N(3)-C(14)  | 1.2955(17) |
| C(8)-C(10)  | 1.5225(19) |
| C(8)-C(9)   | 1.526(2)   |
| C(11)-C(13) | 1.5170(19) |
| C(11)-C(12) | 1.5225(19) |
| C(14)-C(15) | 1.4814(18) |
| C(14)-C(21) | 1.4871(19) |
| C(15)-C(20) | 1.397(2)   |
| C(15)-C(16) | 1.3980(19) |
| C(16)-C(17) | 1.397(2)   |
| C(17)-C(18) | 1.377(3)   |



Supplementary Material (ESI) for Chemical Communications  
This journal is © The Royal Society of Chemistry 2005

|              |            |
|--------------|------------|
| C(18)-C(19)  | 1.388(2)   |
| C(19)-C(20)  | 1.387(2)   |
| C(21)-C(22)  | 1.387(2)   |
| C(21)-C(26)  | 1.3888(15) |
| C(22)-C(23)  | 1.392(2)   |
| C(23)-C(24)  | 1.369(3)   |
| C(24)-C(25)  | 1.377(3)   |
| C(25)-C(26)  | 1.3912(19) |
| C(3)-C(7)    | 1.4200     |
| C(3)-C(4)    | 1.4200     |
| C(4)-C(5)    | 1.4200     |
| C(5)-C(6)    | 1.4200     |
| C(6)-C(7)    | 1.4200     |
| C(3A)-C(4A)  | 1.4200     |
| C(3A)-C(7A)  | 1.4200     |
| C(4A)-C(5A)  | 1.4200     |
| C(5A)-C(6A)  | 1.4200     |
| C(6A)-C(7A)  | 1.4200     |
| Cl(1S)-C(1S) | 1.7607(18) |
| Cl(2S)-C(1S) | 1.7620(18) |

|                   |           |
|-------------------|-----------|
| C(2)-Fe(1)-C(1)   | 92.21(6)  |
| C(2)-Fe(1)-C(4A)  | 134.59(5) |
| C(1)-Fe(1)-C(4A)  | 94.04(5)  |
| C(2)-Fe(1)-C(5)   | 107.90(5) |
| C(1)-Fe(1)-C(5)   | 96.54(5)  |
| C(4A)-Fe(1)-C(5)  | 26.7      |
| C(2)-Fe(1)-C(6)   | 90.31(5)  |
| C(1)-Fe(1)-C(6)   | 133.79(5) |
| C(4A)-Fe(1)-C(6)  | 54.5      |
| C(5)-Fe(1)-C(6)   | 39.7      |
| C(2)-Fe(1)-C(5A)  | 96.82(5)  |
| C(1)-Fe(1)-C(5A)  | 113.37(5) |
| C(4A)-Fe(1)-C(5A) | 40.3      |
| C(5)-Fe(1)-C(5A)  | 19.3      |
| C(6)-Fe(1)-C(5A)  | 21.0      |

Supplementary Material (ESI) for Chemical Communications  
This journal is © The Royal Society of Chemistry 2005

|                   |           |
|-------------------|-----------|
| C(2)-Fe(1)-C(4)   | 147.16(5) |
| C(1)-Fe(1)-C(4)   | 88.52(5)  |
| C(4A)-Fe(1)-C(4)  | 13.3      |
| C(5)-Fe(1)-C(4)   | 39.6      |
| C(6)-Fe(1)-C(4)   | 66.4      |
| C(5A)-Fe(1)-C(4)  | 53.5      |
| C(2)-Fe(1)-C(7)   | 110.76(5) |
| C(1)-Fe(1)-C(7)   | 154.40(5) |
| C(4A)-Fe(1)-C(7)  | 62.0      |
| C(5)-Fe(1)-C(7)   | 66.4      |
| C(6)-Fe(1)-C(7)   | 39.5      |
| C(5A)-Fe(1)-C(7)  | 54.6      |
| C(4)-Fe(1)-C(7)   | 66.1      |
| C(2)-Fe(1)-C(3)   | 149.98(5) |
| C(1)-Fe(1)-C(3)   | 117.40(5) |
| C(4A)-Fe(1)-C(3)  | 44.6      |
| C(5)-Fe(1)-C(3)   | 66.2      |
| C(6)-Fe(1)-C(3)   | 66.2      |
| C(5A)-Fe(1)-C(3)  | 68.1      |
| C(4)-Fe(1)-C(3)   | 39.3      |
| C(7)-Fe(1)-C(3)   | 39.3      |
| C(2)-Fe(1)-C(3A)  | 153.02(5) |
| C(1)-Fe(1)-C(3A)  | 113.31(5) |
| C(4A)-Fe(1)-C(3A) | 39.7      |
| C(5)-Fe(1)-C(3A)  | 62.4      |
| C(6)-Fe(1)-C(3A)  | 66.0      |
| C(5A)-Fe(1)-C(3A) | 65.9      |
| C(4)-Fe(1)-C(3A)  | 34.0      |
| C(7)-Fe(1)-C(3A)  | 42.5      |
| C(3)-Fe(1)-C(3A)  | 5.4       |
| C(2)-Fe(1)-P(1)   | 97.23(5)  |
| C(1)-Fe(1)-P(1)   | 91.70(4)  |
| C(4A)-Fe(1)-P(1)  | 127.42(3) |
| C(5)-Fe(1)-P(1)   | 153.14(3) |
| C(6)-Fe(1)-P(1)   | 133.66(3) |
| C(5A)-Fe(1)-P(1)  | 150.64(3) |

Supplementary Material (ESI) for Chemical Communications  
This journal is © The Royal Society of Chemistry 2005

|                   |            |
|-------------------|------------|
| C(4)-Fe(1)-P(1)   | 115.57(2)  |
| C(7)-Fe(1)-P(1)   | 96.27(2)   |
| C(3)-Fe(1)-P(1)   | 87.28(2)   |
| C(3A)-Fe(1)-P(1)  | 90.88(2)   |
| C(2)-Fe(1)-C(6A)  | 89.89(5)   |
| C(1)-Fe(1)-C(6A)  | 151.50(5)  |
| C(4A)-Fe(1)-C(6A) | 65.1       |
| C(5)-Fe(1)-C(6A)  | 56.0       |
| C(6)-Fe(1)-C(6A)  | 17.7       |
| C(5A)-Fe(1)-C(6A) | 38.3       |
| C(4)-Fe(1)-C(6A)  | 74.8       |
| C(7)-Fe(1)-C(6A)  | 26.6       |
| C(3)-Fe(1)-C(6A)  | 61.9       |
| C(3A)-Fe(1)-C(6A) | 63.6       |
| P(1)-Fe(1)-C(6A)  | 116.22(2)  |
| N(2)-P(1)-N(1)    | 108.96(6)  |
| N(2)-P(1)-Fe(1)   | 124.59(4)  |
| N(1)-P(1)-Fe(1)   | 126.19(4)  |
| Cl(3)-Al(1)-Cl(2) | 110.34(3)  |
| Cl(3)-Al(1)-Cl(1) | 109.37(3)  |
| Cl(2)-Al(1)-Cl(1) | 110.18(3)  |
| Cl(3)-Al(1)-Cl(4) | 108.68(2)  |
| Cl(2)-Al(1)-Cl(4) | 109.04(2)  |
| Cl(1)-Al(1)-Cl(4) | 109.19(3)  |
| C(8)-N(1)-C(11)   | 116.14(10) |
| C(8)-N(1)-P(1)    | 119.41(8)  |
| C(11)-N(1)-P(1)   | 124.45(8)  |
| N(3)-N(2)-P(1)    | 114.45(9)  |
| C(14)-N(3)-N(2)   | 113.36(11) |
| O(1)-C(1)-Fe(1)   | 176.54(13) |
| O(2)-C(2)-Fe(1)   | 178.10(14) |
| N(1)-C(8)-C(10)   | 111.53(11) |
| N(1)-C(8)-C(9)    | 111.22(11) |
| C(10)-C(8)-C(9)   | 112.36(12) |
| N(1)-C(11)-C(13)  | 112.75(11) |
| N(1)-C(11)-C(12)  | 111.79(11) |

Supplementary Material (ESI) for Chemical Communications  
This journal is © The Royal Society of Chemistry 2005

|                   |            |
|-------------------|------------|
| C(13)-C(11)-C(12) | 112.43(12) |
| N(3)-C(14)-C(15)  | 117.68(12) |
| N(3)-C(14)-C(21)  | 122.93(12) |
| C(15)-C(14)-C(21) | 119.39(11) |
| C(20)-C(15)-C(16) | 118.90(13) |
| C(20)-C(15)-C(14) | 121.20(12) |
| C(16)-C(15)-C(14) | 119.90(13) |
| C(17)-C(16)-C(15) | 120.00(15) |
| C(18)-C(17)-C(16) | 120.38(15) |
| C(17)-C(18)-C(19) | 120.08(14) |
| C(20)-C(19)-C(18) | 120.00(16) |
| C(19)-C(20)-C(15) | 120.62(14) |
| C(22)-C(21)-C(26) | 119.42(13) |
| C(22)-C(21)-C(14) | 120.64(13) |
| C(26)-C(21)-C(14) | 119.93(11) |
| C(21)-C(22)-C(23) | 120.01(16) |
| C(24)-C(23)-C(22) | 120.24(16) |
| C(23)-C(24)-C(25) | 120.25(16) |
| C(24)-C(25)-C(26) | 120.15(15) |
| C(21)-C(26)-C(25) | 119.92(11) |
| C(7)-C(3)-C(4)    | 108.0      |
| C(7)-C(3)-Fe(1)   | 70.1       |
| C(4)-C(3)-Fe(1)   | 69.8       |
| C(5)-C(4)-C(3)    | 108.0      |
| C(5)-C(4)-Fe(1)   | 69.6       |
| C(3)-C(4)-Fe(1)   | 70.9       |
| C(4)-C(5)-C(6)    | 108.0      |
| C(4)-C(5)-Fe(1)   | 70.8       |
| C(6)-C(5)-Fe(1)   | 70.3       |
| C(5)-C(6)-C(7)    | 108.0      |
| C(5)-C(6)-Fe(1)   | 70.0       |
| C(7)-C(6)-Fe(1)   | 70.9       |
| C(6)-C(7)-C(3)    | 108.0      |
| C(6)-C(7)-Fe(1)   | 69.5       |
| C(3)-C(7)-Fe(1)   | 70.7       |
| C(4A)-C(3A)-C(7A) | 108.0      |

Supplementary Material (ESI) for Chemical Communications  
This journal is © The Royal Society of Chemistry 2005

|                     |           |
|---------------------|-----------|
| C(4A)-C(3A)-Fe(1)   | 66.2      |
| C(7A)-C(3A)-Fe(1)   | 75.6      |
| C(3A)-C(4A)-C(5A)   | 108.0     |
| C(3A)-C(4A)-Fe(1)   | 74.0      |
| C(5A)-C(4A)-Fe(1)   | 72.1      |
| C(6A)-C(5A)-C(4A)   | 108.0     |
| C(6A)-C(5A)-Fe(1)   | 76.0      |
| C(4A)-C(5A)-Fe(1)   | 67.7      |
| C(5A)-C(6A)-C(7A)   | 108.0     |
| C(5A)-C(6A)-Fe(1)   | 65.8      |
| C(7A)-C(6A)-Fe(1)   | 72.5      |
| C(6A)-C(7A)-C(3A)   | 108.0     |
| C(6A)-C(7A)-Fe(1)   | 70.5      |
| C(3A)-C(7A)-Fe(1)   | 66.8      |
| Cl(1S)-C(1S)-Cl(2S) | 112.21(9) |

---

Symmetry transformations used to generate equivalent atoms:

Supplementary Material (ESI) for Chemical Communications  
 This journal is © The Royal Society of Chemistry 2005

Table 3. Anisotropic displacement parameters ( $\text{\AA}^2 \times 10^3$ ) for  $[\text{CpFe}(\text{CO})_2(\eta^1\text{-P}(\text{N}^i\text{Pr}_2)=\text{N}-\text{N}(\text{=CPh})_2)]\text{-AlCl}_4$  (7). The anisotropic displacement factor exponent takes the form:  $-2\pi^2 [h^2 a^{*2}U^{11} + \dots + 2 h k a^* b^* U^{12}]$

|       | U <sup>11</sup> | U <sup>22</sup> | U <sup>33</sup> | U <sup>23</sup> | U <sup>13</sup> | U <sup>12</sup> |
|-------|-----------------|-----------------|-----------------|-----------------|-----------------|-----------------|
| Fe(1) | 16(1)           | 19(1)           | 16(1)           | 3(1)            | 0(1)            | -1(1)           |
| Cl(1) | 40(1)           | 60(1)           | 25(1)           | 7(1)            | 0(1)            | 5(1)            |
| Cl(2) | 36(1)           | 43(1)           | 41(1)           | -13(1)          | 20(1)           | -6(1)           |
| Cl(3) | 63(1)           | 24(1)           | 41(1)           | -5(1)           | 19(1)           | -11(1)          |
| Cl(4) | 35(1)           | 29(1)           | 21(1)           | -7(1)           | 8(1)            | 1(1)            |
| P(1)  | 14(1)           | 17(1)           | 15(1)           | 2(1)            | 2(1)            | -2(1)           |
| Al(1) | 28(1)           | 23(1)           | 18(1)           | -3(1)           | 7(1)            | -3(1)           |
| O(1)  | 27(1)           | 47(1)           | 22(1)           | 0(1)            | 7(1)            | -3(1)           |
| O(2)  | 27(1)           | 30(1)           | 40(1)           | -10(1)          | 5(1)            | -6(1)           |
| N(1)  | 14(1)           | 18(1)           | 16(1)           | 3(1)            | 2(1)            | -1(1)           |
| N(2)  | 17(1)           | 24(1)           | 18(1)           | 4(1)            | 2(1)            | -5(1)           |
| N(3)  | 18(1)           | 24(1)           | 19(1)           | 5(1)            | 3(1)            | -3(1)           |
| C(1)  | 21(1)           | 29(1)           | 18(1)           | 4(1)            | -1(1)           | -3(1)           |
| C(2)  | 18(1)           | 28(1)           | 21(1)           | -1(1)           | 2(1)            | 1(1)            |
| C(8)  | 16(1)           | 22(1)           | 21(1)           | 3(1)            | 4(1)            | -3(1)           |
| C(9)  | 23(1)           | 37(1)           | 29(1)           | 2(1)            | 11(1)           | 1(1)            |
| C(10) | 28(1)           | 23(1)           | 33(1)           | 2(1)            | 4(1)            | -9(1)           |
| C(11) | 19(1)           | 22(1)           | 16(1)           | 4(1)            | 2(1)            | 2(1)            |
| C(12) | 27(1)           | 27(1)           | 24(1)           | 4(1)            | 3(1)            | 10(1)           |
| C(13) | 27(1)           | 29(1)           | 17(1)           | -1(1)           | 1(1)            | 0(1)            |
| C(14) | 15(1)           | 20(1)           | 22(1)           | 3(1)            | 4(1)            | 0(1)            |
| C(15) | 17(1)           | 20(1)           | 28(1)           | 5(1)            | 7(1)            | 1(1)            |
| C(16) | 20(1)           | 23(1)           | 34(1)           | 3(1)            | 8(1)            | -2(1)           |
| C(17) | 24(1)           | 24(1)           | 49(1)           | 6(1)            | 14(1)           | -4(1)           |
| C(18) | 28(1)           | 28(1)           | 45(1)           | 15(1)           | 16(1)           | 2(1)            |
| C(19) | 31(1)           | 35(1)           | 30(1)           | 12(1)           | 10(1)           | 1(1)            |
| C(20) | 23(1)           | 29(1)           | 28(1)           | 7(1)            | 6(1)            | -2(1)           |
| C(21) | 18(1)           | 21(1)           | 23(1)           | 0(1)            | 3(1)            | -5(1)           |
| C(22) | 29(1)           | 30(1)           | 33(1)           | -4(1)           | 8(1)            | 1(1)            |
| C(23) | 48(1)           | 39(1)           | 34(1)           | -13(1)          | 15(1)           | -9(1)           |

Supplementary Material (ESI) for Chemical Communications  
This journal is © The Royal Society of Chemistry 2005

|        |       |       |        |       |        |        |
|--------|-------|-------|--------|-------|--------|--------|
| C(24)  | 46(1) | 44(1) | 24(1)  | -6(1) | 1(1)   | -19(1) |
| C(25)  | 33(1) | 46(1) | 30(1)  | 3(1)  | -7(1)  | -4(1)  |
| C(26)  | 25(1) | 34(1) | 27(1)  | -1(1) | -1(1)  | 2(1)   |
| C(3)   | 41(1) | 24(1) | 36(1)  | -6(1) | -3(1)  | 8(1)   |
| C(4)   | 49(1) | 19(1) | 52(1)  | 7(1)  | 22(1)  | -2(1)  |
| C(5)   | 77(2) | 28(1) | 28(1)  | 5(1)  | -15(1) | 19(1)  |
| C(6)   | 22(1) | 25(1) | 103(2) | 1(1)  | -11(1) | 7(1)   |
| C(7)   | 48(1) | 30(1) | 51(1)  | 15(1) | 27(1)  | 21(1)  |
| C(3A)  | 41(1) | 24(1) | 36(1)  | -6(1) | -3(1)  | 8(1)   |
| C(4A)  | 49(1) | 19(1) | 52(1)  | 7(1)  | 22(1)  | -2(1)  |
| C(5A)  | 77(2) | 28(1) | 28(1)  | 5(1)  | -15(1) | 19(1)  |
| C(6A)  | 22(1) | 25(1) | 103(2) | 1(1)  | -11(1) | 7(1)   |
| C(7A)  | 48(1) | 30(1) | 51(1)  | 15(1) | 27(1)  | 21(1)  |
| Cl(1S) | 41(1) | 54(1) | 32(1)  | -2(1) | 6(1)   | -11(1) |
| Cl(2S) | 35(1) | 71(1) | 35(1)  | 5(1)  | 2(1)   | 9(1)   |
| C(1S)  | 28(1) | 50(1) | 34(1)  | -8(1) | 6(1)   | -10(1) |

---

Table 4. Hydrogen coordinates ( $\times 10^4$ ) and isotropic displacement parameters ( $\text{\AA}^2 \times 10^{-3}$ ) for  $[\text{CpFe}(\text{CO})_2(\eta^1\text{-P}(\text{N}^i\text{Pr}_2)=\text{N}-\text{N}(\text{=CPh})_2)]\text{AlCl}_4$  (7).

|        | x     | y    | z    | U(eq) |
|--------|-------|------|------|-------|
| H(8)   | 1997  | 5784 | 2235 | 23    |
| H(9C)  | 1602  | 5983 | 720  | 34    |
| H(9B)  | 1960  | 5182 | 1116 | 34    |
| H(9A)  | 2991  | 5872 | 1223 | 34    |
| H(10C) | 1227  | 7040 | 2317 | 34    |
| H(10B) | 1102  | 7141 | 1468 | 34    |
| H(10A) | 2513  | 7037 | 1951 | 34    |
| H(11)  | -361  | 6382 | 847  | 23    |
| H(12C) | -2485 | 6189 | 1609 | 31    |
| H(12B) | -2499 | 6725 | 922  | 31    |
| H(12A) | -1567 | 6931 | 1658 | 31    |
| H(13C) | -1917 | 5043 | 857  | 29    |
| H(13B) | -645  | 5101 | 482  | 29    |
| H(13A) | -1914 | 5603 | 188  | 29    |
| H(16)  | -5095 | 3022 | 2182 | 30    |
| H(17)  | -6151 | 2344 | 2990 | 37    |
| H(18)  | -5522 | 2513 | 4215 | 39    |
| H(19)  | -3799 | 3340 | 4650 | 38    |
| H(20)  | -2724 | 4012 | 3854 | 32    |
| H(22)  | -2254 | 3195 | 1448 | 37    |
| H(23)  | -3000 | 3085 | 217  | 47    |
| H(24)  | -4813 | 3773 | -317 | 46    |
| H(25)  | -5918 | 4567 | 367  | 45    |
| H(26)  | -5196 | 4680 | 1601 | 35    |
| H(3)   | 379   | 3570 | 2474 | 42    |
| H(4)   | 217   | 3445 | 3791 | 46    |
| H(5)   | 2245  | 4049 | 4510 | 56    |
| H(6)   | 3660  | 4547 | 3638 | 63    |
| H(7)   | 2507  | 4251 | 2380 | 49    |
| H(3A)  | 200   | 3453 | 2713 | 42    |



Supplementary Material (ESI) for Chemical Communications  
This journal is © The Royal Society of Chemistry 2005

|        |       |      |      |    |
|--------|-------|------|------|----|
| H(4A)  | 886   | 3561 | 4058 | 46 |
| H(5A)  | 3043  | 4280 | 4298 | 56 |
| H(6A)  | 3691  | 4615 | 3102 | 63 |
| H(7A)  | 1934  | 4104 | 2122 | 49 |
| H(1S2) | -3254 | 5386 | 3445 | 44 |
| H(1S1) | -3433 | 6281 | 3587 | 44 |

---

Table 5. Atomic coordinates ( $\times 10^4$ ) and equivalent isotropic displacement parameters ( $\text{\AA}^2 \times 10^3$ ) for  $[\text{CpFe}(\text{CO})_2(\eta^1\text{-P}(\text{N}^i\text{Pr}_2)=\text{CH}(\text{SiMe}_3))\text{AlCl}_4$  (**9**).  $U(\text{eq})$  is defined as one third of the trace of the orthogonalized  $U^{ij}$  tensor.

|        | x        | y        | z         | U(eq) |
|--------|----------|----------|-----------|-------|
| Al(1)  | 7690(2)  | 5518(3)  | 12541(2)  | 27(1) |
| Cl(1)  | 7840(2)  | 7282(1)  | 11791(2)  | 50(1) |
| Cl(2)  | 6264(2)  | 5438(3)  | 13798(2)  | 84(1) |
| Cl(3)  | 9396(2)  | 5084(3)  | 13489(3)  | 47(1) |
| Cl(4)  | 7411(2)  | 4246(2)  | 11132(2)  | 64(1) |
| Al(1A) | 7792(13) | 5524(15) | 12688(14) | 27(1) |
| Cl(1A) | 7801(14) | 7064(10) | 11557(11) | 50(1) |
| Cl(2A) | 6418(15) | 5810(20) | 13930(16) | 84(1) |
| Cl(3A) | 9679(6)  | 5324(8)  | 13093(7)  | 47(1) |
| Cl(4A) | 7158(10) | 4084(9)  | 11611(9)  | 64(1) |
| Al(1B) | 7996(13) | 5578(15) | 12528(14) | 27(1) |
| Cl(1B) | 7472(14) | 4856(11) | 10932(11) | 50(1) |
| Cl(2B) | 7512(14) | 4416(18) | 13975(13) | 84(1) |
| Cl(3B) | 9897(8)  | 5623(10) | 12288(9)  | 47(1) |
| Cl(4B) | 7057(13) | 7242(13) | 12895(14) | 64(1) |
| Al(1C) | 7872(14) | 5425(13) | 12615(14) | 27(1) |
| Cl(1C) | 7329(7)  | 7314(6)  | 12414(7)  | 50(1) |
| Cl(2C) | 6766(8)  | 4548(12) | 13941(8)  | 84(1) |
| Cl(3C) | 9594(13) | 5040(19) | 13487(18) | 47(1) |
| Cl(4C) | 7206(14) | 4536(13) | 11025(13) | 64(1) |
| Fe(1)  | 211(1)   | 5356(1)  | 7676(1)   | 29(1) |
| P(1)   | 2266(1)  | 5546(1)  | 7680(1)   | 25(1) |
| Si(1)  | 3026(1)  | 5829(1)  | 10498(1)  | 39(1) |
| O(1)   | 324(3)   | 3954(4)  | 9867(3)   | 69(1) |
| O(2)   | 28(3)    | 3242(2)  | 6124(3)   | 49(1) |
| N(1)   | 3013(2)  | 5520(2)  | 6416(2)   | 29(1) |
| C(1)   | 3174(3)  | 5682(3)  | 8854(2)   | 36(1) |
| C(2)   | 1532(4)  | 6568(5)  | 10949(3)  | 70(1) |
| C(3)   | 3284(5)  | 4324(4)  | 11200(4)  | 62(1) |
| C(4)   | 4308(5)  | 6850(5)  | 10973(4)  | 69(1) |

Supplementary Material (ESI) for Chemical Communications  
This journal is © The Royal Society of Chemistry 2005

|        |           |          |           |       |
|--------|-----------|----------|-----------|-------|
| C(5)   | 4398(2)   | 5550(4)  | 6312(3)   | 41(1) |
| C(6)   | 5035(4)   | 4416(4)  | 6843(4)   | 51(1) |
| C(7)   | 4981(5)   | 6736(4)  | 6690(9)   | 53(1) |
| C(8)   | 2321(3)   | 5412(4)  | 5266(2)   | 39(1) |
| C(9)   | 2574(4)   | 6523(5)  | 4480(4)   | 64(1) |
| C(10)  | 2602(4)   | 4204(5)  | 4648(4)   | 59(1) |
| C(11)  | 313(3)    | 4479(4)  | 9006(3)   | 45(1) |
| C(12)  | 171(3)    | 4073(3)  | 6729(3)   | 36(1) |
| C(13)  | -40(3)    | 7224(3)  | 7960(3)   | 42(1) |
| C(14)  | -209(5)   | 6941(4)  | 6727(3)   | 58(1) |
| C(15)  | -1210(5)  | 6117(5)  | 6614(4)   | 69(1) |
| C(16)  | -1661(4)  | 5871(5)  | 7762(4)   | 63(1) |
| C(17)  | -944(3)   | 6574(4)  | 8576(3)   | 47(1) |
| Fe(1A) | -199(3)   | 5296(4)  | 7528(3)   | 29(1) |
| P(1A)  | 1799(4)   | 5647(4)  | 7899(4)   | 25(1) |
| Si(1A) | 3654(6)   | 5940(6)  | 10288(5)  | 39(1) |
| O(1A)  | -260(20)  | 3620(20) | 9571(18)  | 69(1) |
| O(2A)  | 360(20)   | 3408(17) | 5770(17)  | 49(1) |
| N(1A)  | 2809(11)  | 5714(15) | 6854(10)  | 29(1) |
| C(1A)  | 2354(14)  | 5823(19) | 9209(11)  | 36(1) |
| C(2A)  | 3070(30)  | 7150(30) | 11382(19) | 70(1) |
| C(3A)  | 3790(30)  | 4423(19) | 10980(30) | 62(1) |
| C(4A)  | 5164(17)  | 6440(30) | 9780(20)  | 69(1) |
| C(5A)  | 4160(12)  | 5762(19) | 7114(16)  | 41(1) |
| C(6A)  | 4860(30)  | 4630(30) | 6640(30)  | 51(1) |
| C(7A)  | 4820(40)  | 6900(30) | 6710(70)  | 53(1) |
| C(8A)  | 2410(20)  | 5754(19) | 5579(13)  | 39(1) |
| C(9A)  | 2500(30)  | 6990(20) | 4960(20)  | 64(1) |
| C(10A) | 2800(30)  | 4770(30) | 4740(20)  | 59(1) |
| C(11A) | -190(20)  | 4371(18) | 8853(16)  | 45(1) |
| C(12A) | -30(20)   | 4015(19) | 6570(20)  | 36(1) |
| C(13A) | -474(18)  | 7165(13) | 7591(17)  | 42(1) |
| C(14A) | -690(20)  | 6726(18) | 6396(16)  | 58(1) |
| C(15A) | -1692(19) | 5910(20) | 6466(17)  | 69(1) |
| C(16A) | -2065(14) | 5790(20) | 7650(20)  | 63(1) |
| C(17A) | -1339(17) | 6581(18) | 8322(17)  | 47(1) |

Supplementary Material (ESI) for Chemical Communications  
This journal is © The Royal Society of Chemistry 2005

---

Table 6. Bond lengths [Å] and angles [°] for [CpFe(CO)<sub>2</sub>(η<sup>1</sup>-P(N<sup>t</sup>Pr<sub>2</sub>)=CH(SiMe<sub>3</sub>)]AlCl<sub>4</sub> (**9**).

---

|               |           |
|---------------|-----------|
| Al(1)-Cl(2)   | 2.099(3)  |
| Al(1)-Cl(1)   | 2.124(3)  |
| Al(1)-Cl(4)   | 2.131(3)  |
| Al(1)-Cl(3)   | 2.156(3)  |
| Al(1A)-Cl(2A) | 2.068(16) |
| Al(1A)-Cl(3A) | 2.079(14) |
| Al(1A)-Cl(4A) | 2.102(15) |
| Al(1A)-Cl(1A) | 2.118(16) |
| Al(1B)-Cl(1B) | 2.030(16) |
| Al(1B)-Cl(3B) | 2.061(14) |
| Al(1B)-Cl(4B) | 2.134(15) |
| Al(1B)-Cl(2B) | 2.138(16) |
| Al(1C)-Cl(3C) | 2.119(16) |
| Al(1C)-Cl(4C) | 2.147(16) |
| Al(1C)-Cl(2C) | 2.148(15) |
| Al(1C)-Cl(1C) | 2.171(15) |
| Fe(1)-C(12)   | 1.769(3)  |
| Fe(1)-C(11)   | 1.780(3)  |
| Fe(1)-C(14)   | 2.090(4)  |
| Fe(1)-C(16)   | 2.090(4)  |
| Fe(1)-C(15)   | 2.095(4)  |
| Fe(1)-C(17)   | 2.096(3)  |
| Fe(1)-C(13)   | 2.100(3)  |
| Fe(1)-P(1)    | 2.2135(8) |
| P(1)-C(1)     | 1.633(3)  |
| P(1)-N(1)     | 1.641(2)  |
| Si(1)-C(4)    | 1.848(4)  |
| Si(1)-C(3)    | 1.853(4)  |
| Si(1)-C(1)    | 1.862(3)  |
| Si(1)-C(2)    | 1.873(4)  |
| O(1)-C(11)    | 1.125(4)  |
| O(2)-C(12)    | 1.147(4)  |
| N(1)-C(8)     | 1.484(3)  |
| N(1)-C(5)     | 1.492(3)  |

Supplementary Material (ESI) for Chemical Communications  
This journal is © The Royal Society of Chemistry 2005

|               |           |
|---------------|-----------|
| C(5)-C(7)     | 1.505(7)  |
| C(5)-C(6)     | 1.539(5)  |
| C(8)-C(10)    | 1.532(6)  |
| C(8)-C(9)     | 1.535(5)  |
| C(13)-C(17)   | 1.397(5)  |
| C(13)-C(14)   | 1.428(5)  |
| C(14)-C(15)   | 1.410(8)  |
| C(15)-C(16)   | 1.410(7)  |
| C(16)-C(17)   | 1.416(5)  |
| Fe(1A)-C(12A) | 1.785(13) |
| Fe(1A)-C(11A) | 1.803(12) |
| Fe(1A)-C(13A) | 2.080(14) |
| Fe(1A)-C(17A) | 2.081(14) |
| Fe(1A)-C(16A) | 2.082(15) |
| Fe(1A)-C(14A) | 2.085(14) |
| Fe(1A)-C(15A) | 2.091(15) |
| Fe(1A)-P(1A)  | 2.210(5)  |
| P(1A)-C(1A)   | 1.589(11) |
| P(1A)-N(1A)   | 1.612(12) |
| Si(1A)-C(4A)  | 1.810(16) |
| Si(1A)-C(1A)  | 1.837(12) |
| Si(1A)-C(3A)  | 1.847(16) |
| Si(1A)-C(2A)  | 1.927(16) |
| O(1A)-C(11A)  | 1.155(15) |
| O(2A)-C(12A)  | 1.202(17) |
| N(1A)-C(5A)   | 1.475(14) |
| N(1A)-C(8A)   | 1.489(15) |
| C(5A)-C(7A)   | 1.51(2)   |
| C(5A)-C(6A)   | 1.551(19) |
| C(8A)-C(10A)  | 1.502(18) |
| C(8A)-C(9A)   | 1.533(18) |
| C(13A)-C(17A) | 1.405(17) |
| C(13A)-C(14A) | 1.441(18) |
| C(14A)-C(15A) | 1.407(19) |
| C(15A)-C(16A) | 1.399(18) |
| C(16A)-C(17A) | 1.383(18) |

Supplementary Material (ESI) for Chemical Communications  
This journal is © The Royal Society of Chemistry 2005

|                      |            |
|----------------------|------------|
| Cl(2)-Al(1)-Cl(1)    | 111.49(16) |
| Cl(2)-Al(1)-Cl(4)    | 112.11(15) |
| Cl(1)-Al(1)-Cl(4)    | 108.50(13) |
| Cl(2)-Al(1)-Cl(3)    | 106.30(15) |
| Cl(1)-Al(1)-Cl(3)    | 109.23(15) |
| Cl(4)-Al(1)-Cl(3)    | 109.15(15) |
| Cl(2A)-Al(1A)-Cl(3A) | 124.8(9)   |
| Cl(2A)-Al(1A)-Cl(4A) | 105.9(9)   |
| Cl(3A)-Al(1A)-Cl(4A) | 110.5(8)   |
| Cl(2A)-Al(1A)-Cl(1A) | 107.1(10)  |
| Cl(3A)-Al(1A)-Cl(1A) | 101.6(8)   |
| Cl(4A)-Al(1A)-Cl(1A) | 105.3(8)   |
| Cl(1B)-Al(1B)-Cl(3B) | 98.9(8)    |
| Cl(1B)-Al(1B)-Cl(4B) | 112.4(9)   |
| Cl(3B)-Al(1B)-Cl(4B) | 118.4(9)   |
| Cl(1B)-Al(1B)-Cl(2B) | 111.6(9)   |
| Cl(3B)-Al(1B)-Cl(2B) | 111.5(8)   |
| Cl(4B)-Al(1B)-Cl(2B) | 104.2(9)   |
| Cl(3C)-Al(1C)-Cl(4C) | 124.6(10)  |
| Cl(3C)-Al(1C)-Cl(2C) | 94.4(8)    |
| Cl(4C)-Al(1C)-Cl(2C) | 101.0(8)   |
| Cl(3C)-Al(1C)-Cl(1C) | 118.0(9)   |
| Cl(4C)-Al(1C)-Cl(1C) | 105.4(7)   |
| Cl(2C)-Al(1C)-Cl(1C) | 110.6(8)   |
| C(12)-Fe(1)-C(11)    | 94.09(19)  |
| C(12)-Fe(1)-C(14)    | 110.95(17) |
| C(11)-Fe(1)-C(14)    | 152.94(17) |
| C(12)-Fe(1)-C(16)    | 103.31(16) |
| C(11)-Fe(1)-C(16)    | 98.90(19)  |
| C(14)-Fe(1)-C(16)    | 66.3(2)    |
| C(12)-Fe(1)-C(15)    | 88.11(16)  |
| C(11)-Fe(1)-C(15)    | 136.8(2)   |
| C(14)-Fe(1)-C(15)    | 39.4(2)    |
| C(16)-Fe(1)-C(15)    | 39.4(2)    |
| C(12)-Fe(1)-C(17)    | 142.38(16) |

Supplementary Material (ESI) for Chemical Communications  
This journal is © The Royal Society of Chemistry 2005

|                   |            |
|-------------------|------------|
| C(11)-Fe(1)-C(17) | 88.39(17)  |
| C(14)-Fe(1)-C(17) | 65.63(15)  |
| C(16)-Fe(1)-C(17) | 39.53(15)  |
| C(15)-Fe(1)-C(17) | 65.67(15)  |
| C(12)-Fe(1)-C(13) | 150.70(16) |
| C(11)-Fe(1)-C(13) | 114.24(17) |
| C(14)-Fe(1)-C(13) | 39.85(15)  |
| C(16)-Fe(1)-C(13) | 66.51(17)  |
| C(15)-Fe(1)-C(13) | 66.44(17)  |
| C(17)-Fe(1)-C(13) | 38.89(14)  |
| C(12)-Fe(1)-P(1)  | 95.23(12)  |
| C(11)-Fe(1)-P(1)  | 90.10(12)  |
| C(14)-Fe(1)-P(1)  | 97.38(14)  |
| C(16)-Fe(1)-P(1)  | 158.66(14) |
| C(15)-Fe(1)-P(1)  | 132.73(17) |
| C(17)-Fe(1)-P(1)  | 122.32(11) |
| C(13)-Fe(1)-P(1)  | 92.15(10)  |
| C(1)-P(1)-N(1)    | 113.92(13) |
| C(1)-P(1)-Fe(1)   | 126.26(11) |
| N(1)-P(1)-Fe(1)   | 119.80(8)  |
| C(4)-Si(1)-C(3)   | 108.4(2)   |
| C(4)-Si(1)-C(1)   | 105.24(18) |
| C(3)-Si(1)-C(1)   | 109.18(19) |
| C(4)-Si(1)-C(2)   | 107.1(3)   |
| C(3)-Si(1)-C(2)   | 113.4(2)   |
| C(1)-Si(1)-C(2)   | 113.13(16) |
| C(8)-N(1)-C(5)    | 114.7(2)   |
| C(8)-N(1)-P(1)    | 120.62(17) |
| C(5)-N(1)-P(1)    | 124.62(17) |
| P(1)-C(1)-Si(1)   | 138.41(18) |
| N(1)-C(5)-C(7)    | 114.0(3)   |
| N(1)-C(5)-C(6)    | 112.8(3)   |
| C(7)-C(5)-C(6)    | 114.5(4)   |
| N(1)-C(8)-C(10)   | 111.3(3)   |
| N(1)-C(8)-C(9)    | 110.2(3)   |
| C(10)-C(8)-C(9)   | 113.2(3)   |



Supplementary Material (ESI) for Chemical Communications  
This journal is © The Royal Society of Chemistry 2005

|                      |           |
|----------------------|-----------|
| O(1)-C(11)-Fe(1)     | 176.4(4)  |
| O(2)-C(12)-Fe(1)     | 173.7(3)  |
| C(17)-C(13)-C(14)    | 106.8(4)  |
| C(17)-C(13)-Fe(1)    | 70.4(2)   |
| C(14)-C(13)-Fe(1)    | 69.7(2)   |
| C(15)-C(14)-C(13)    | 108.2(3)  |
| C(15)-C(14)-Fe(1)    | 70.5(2)   |
| C(13)-C(14)-Fe(1)    | 70.46(19) |
| C(16)-C(15)-C(14)    | 108.3(3)  |
| C(16)-C(15)-Fe(1)    | 70.1(2)   |
| C(14)-C(15)-Fe(1)    | 70.1(2)   |
| C(15)-C(16)-C(17)    | 107.1(4)  |
| C(15)-C(16)-Fe(1)    | 70.5(2)   |
| C(17)-C(16)-Fe(1)    | 70.5(2)   |
| C(13)-C(17)-C(16)    | 109.6(3)  |
| C(13)-C(17)-Fe(1)    | 70.71(18) |
| C(16)-C(17)-Fe(1)    | 70.0(2)   |
| C(12A)-Fe(1A)-C(11A) | 93.0(11)  |
| C(12A)-Fe(1A)-C(13A) | 144.9(10) |
| C(11A)-Fe(1A)-C(13A) | 122.0(9)  |
| C(12A)-Fe(1A)-C(17A) | 149.4(10) |
| C(11A)-Fe(1A)-C(17A) | 91.5(9)   |
| C(13A)-Fe(1A)-C(17A) | 39.5(5)   |
| C(12A)-Fe(1A)-C(16A) | 110.6(10) |
| C(11A)-Fe(1A)-C(16A) | 95.0(9)   |
| C(13A)-Fe(1A)-C(16A) | 66.5(7)   |
| C(17A)-Fe(1A)-C(16A) | 38.8(5)   |
| C(12A)-Fe(1A)-C(14A) | 104.8(10) |
| C(11A)-Fe(1A)-C(14A) | 158.0(9)  |
| C(13A)-Fe(1A)-C(14A) | 40.5(6)   |
| C(17A)-Fe(1A)-C(14A) | 66.6(7)   |
| C(16A)-Fe(1A)-C(14A) | 66.9(8)   |
| C(12A)-Fe(1A)-C(15A) | 89.6(9)   |
| C(11A)-Fe(1A)-C(15A) | 130.2(9)  |
| C(13A)-Fe(1A)-C(15A) | 66.1(8)   |
| C(17A)-Fe(1A)-C(15A) | 64.9(7)   |

Supplementary Material (ESI) for Chemical Communications  
This journal is © The Royal Society of Chemistry 2005

|                      |           |
|----------------------|-----------|
| C(16A)-Fe(1A)-C(15A) | 39.2(6)   |
| C(14A)-Fe(1A)-C(15A) | 39.4(6)   |
| C(12A)-Fe(1A)-P(1A)  | 98.4(9)   |
| C(11A)-Fe(1A)-P(1A)  | 87.1(7)   |
| C(13A)-Fe(1A)-P(1A)  | 87.6(6)   |
| C(17A)-Fe(1A)-P(1A)  | 112.0(6)  |
| C(16A)-Fe(1A)-P(1A)  | 150.7(7)  |
| C(14A)-Fe(1A)-P(1A)  | 102.6(7)  |
| C(15A)-Fe(1A)-P(1A)  | 141.5(7)  |
| C(1A)-P(1A)-N(1A)    | 115.0(8)  |
| C(1A)-P(1A)-Fe(1A)   | 122.9(6)  |
| N(1A)-P(1A)-Fe(1A)   | 122.1(5)  |
| C(4A)-Si(1A)-C(1A)   | 119.2(9)  |
| C(4A)-Si(1A)-C(3A)   | 110.0(13) |
| C(1A)-Si(1A)-C(3A)   | 105.5(12) |
| C(4A)-Si(1A)-C(2A)   | 106.9(12) |
| C(1A)-Si(1A)-C(2A)   | 102.5(10) |
| C(3A)-Si(1A)-C(2A)   | 112.5(12) |
| C(5A)-N(1A)-C(8A)    | 117.3(13) |
| C(5A)-N(1A)-P(1A)    | 121.8(10) |
| C(8A)-N(1A)-P(1A)    | 120.9(11) |
| P(1A)-C(1A)-Si(1A)   | 152.5(11) |
| N(1A)-C(5A)-C(7A)    | 116(2)    |
| N(1A)-C(5A)-C(6A)    | 112.4(17) |
| C(7A)-C(5A)-C(6A)    | 109(2)    |
| N(1A)-C(8A)-C(10A)   | 120.2(17) |
| N(1A)-C(8A)-C(9A)    | 116.4(16) |
| C(10A)-C(8A)-C(9A)   | 109.3(18) |
| O(1A)-C(11A)-Fe(1A)  | 168(2)    |
| O(2A)-C(12A)-Fe(1A)  | 158(3)    |
| C(17A)-C(13A)-C(14A) | 107.0(15) |
| C(17A)-C(13A)-Fe(1A) | 70.3(8)   |
| C(14A)-C(13A)-Fe(1A) | 70.0(8)   |
| C(15A)-C(14A)-C(13A) | 106.0(14) |
| C(15A)-C(14A)-Fe(1A) | 70.6(8)   |
| C(13A)-C(14A)-Fe(1A) | 69.6(8)   |

Supplementary Material (ESI) for Chemical Communications  
This journal is © The Royal Society of Chemistry 2005

|                      |           |
|----------------------|-----------|
| C(16A)-C(15A)-C(14A) | 109.9(15) |
| C(16A)-C(15A)-Fe(1A) | 70.1(8)   |
| C(14A)-C(15A)-Fe(1A) | 70.1(8)   |
| C(17A)-C(16A)-C(15A) | 107.2(16) |
| C(17A)-C(16A)-Fe(1A) | 70.6(8)   |
| C(15A)-C(16A)-Fe(1A) | 70.8(9)   |
| C(16A)-C(17A)-C(13A) | 109.8(15) |
| C(16A)-C(17A)-Fe(1A) | 70.6(8)   |
| C(13A)-C(17A)-Fe(1A) | 70.2(8)   |

---

Symmetry transformations used to generate equivalent atoms:

Supplementary Material (ESI) for Chemical Communications  
 This journal is © The Royal Society of Chemistry 2005

Table 7. Anisotropic displacement parameters ( $\text{\AA}^2 \times 10^3$ ) for  $[\text{CpFe}(\text{CO})_2(\eta^1\text{-P}(\text{N}^i\text{Pr}_2)=\text{CH}(\text{SiMe}_3))\text{AlCl}_4$   
 (9). The anisotropic displacement factor exponent takes the form:  $-2\pi^2[ h^2 a^{*2}U^{11} + \dots + 2 h k a^* b^* U^{12} ]$

|        | $U^{11}$ | $U^{22}$ | $U^{33}$ | $U^{23}$ | $U^{13}$ | $U^{12}$ |
|--------|----------|----------|----------|----------|----------|----------|
| Al(1)  | 24(1)    | 27(1)    | 30(1)    | -2(1)    | 1(1)     | 0(1)     |
| Cl(1)  | 60(1)    | 32(1)    | 56(1)    | 10(1)    | -17(1)   | -10(1)   |
| Cl(2)  | 56(1)    | 135(2)   | 63(1)    | 18(1)    | 36(1)    | 7(1)     |
| Cl(3)  | 39(1)    | 46(1)    | 56(1)    | 3(1)     | -13(1)   | 9(1)     |
| Cl(4)  | 71(1)    | 54(1)    | 69(1)    | -37(1)   | -14(1)   | 13(1)    |
| Al(1A) | 24(1)    | 27(1)    | 30(1)    | -2(1)    | 1(1)     | 0(1)     |
| Cl(1A) | 60(1)    | 32(1)    | 56(1)    | 10(1)    | -17(1)   | -10(1)   |
| Cl(2A) | 56(1)    | 135(2)   | 63(1)    | 18(1)    | 36(1)    | 7(1)     |
| Cl(3A) | 39(1)    | 46(1)    | 56(1)    | 3(1)     | -13(1)   | 9(1)     |
| Cl(4A) | 71(1)    | 54(1)    | 69(1)    | -37(1)   | -14(1)   | 13(1)    |
| Al(1B) | 24(1)    | 27(1)    | 30(1)    | -2(1)    | 1(1)     | 0(1)     |
| Cl(1B) | 60(1)    | 32(1)    | 56(1)    | 10(1)    | -17(1)   | -10(1)   |
| Cl(2B) | 56(1)    | 135(2)   | 63(1)    | 18(1)    | 36(1)    | 7(1)     |
| Cl(3B) | 39(1)    | 46(1)    | 56(1)    | 3(1)     | -13(1)   | 9(1)     |
| Cl(4B) | 71(1)    | 54(1)    | 69(1)    | -37(1)   | -14(1)   | 13(1)    |
| Al(1C) | 24(1)    | 27(1)    | 30(1)    | -2(1)    | 1(1)     | 0(1)     |
| Cl(1C) | 60(1)    | 32(1)    | 56(1)    | 10(1)    | -17(1)   | -10(1)   |
| Cl(2C) | 56(1)    | 135(2)   | 63(1)    | 18(1)    | 36(1)    | 7(1)     |
| Cl(3C) | 39(1)    | 46(1)    | 56(1)    | 3(1)     | -13(1)   | 9(1)     |
| Cl(4C) | 71(1)    | 54(1)    | 69(1)    | -37(1)   | -14(1)   | 13(1)    |
| Fe(1)  | 30(1)    | 34(1)    | 24(1)    | 1(1)     | -3(1)    | 0(1)     |
| P(1)   | 29(1)    | 24(1)    | 21(1)    | -2(1)    | -4(1)    | 0(1)     |
| Si(1)  | 43(1)    | 52(1)    | 23(1)    | -1(1)    | -5(1)    | 6(1)     |
| O(1)   | 70(2)    | 86(2)    | 49(2)    | 30(2)    | -2(1)    | -18(2)   |
| O(2)   | 63(2)    | 29(1)    | 55(2)    | -5(1)    | -16(1)   | -9(1)    |
| N(1)   | 26(1)    | 38(1)    | 22(1)    | -2(1)    | -2(1)    | 3(1)     |
| C(1)   | 35(1)    | 48(2)    | 25(1)    | -3(1)    | -6(1)    | -3(1)    |
| C(2)   | 69(2)    | 107(4)   | 32(2)    | -15(2)   | -4(2)    | 30(3)    |
| C(3)   | 74(3)    | 66(3)    | 45(2)    | 20(2)    | -5(2)    | 1(2)     |
| C(4)   | 84(3)    | 70(3)    | 50(2)    | -6(2)    | -34(2)   | -18(2)   |
| C(5)   | 27(1)    | 60(2)    | 36(1)    | 4(1)     | 0(1)     | 2(1)     |

Supplementary Material (ESI) for Chemical Communications  
This journal is © The Royal Society of Chemistry 2005

|        |       |        |       |        |        |        |
|--------|-------|--------|-------|--------|--------|--------|
| C(6)   | 40(2) | 57(2)  | 57(2) | 7(2)   | -6(2)  | 18(2)  |
| C(7)   | 41(2) | 57(2)  | 62(2) | 12(2)  | 0(2)   | -5(2)  |
| C(8)   | 33(1) | 64(2)  | 21(1) | -6(1)  | -5(1)  | 2(2)   |
| C(9)   | 46(2) | 115(4) | 32(2) | 31(2)  | -2(2)  | -4(2)  |
| C(10)  | 42(2) | 90(4)  | 46(2) | -36(2) | 2(2)   | 6(2)   |
| C(11)  | 37(2) | 61(2)  | 39(2) | 13(1)  | -3(1)  | -8(2)  |
| C(12)  | 33(2) | 31(1)  | 43(2) | 3(1)   | -14(1) | -5(1)  |
| C(13)  | 44(2) | 37(1)  | 45(2) | -3(1)  | 3(1)   | 11(1)  |
| C(14)  | 83(3) | 59(2)  | 33(2) | 14(2)  | 12(2)  | 45(2)  |
| C(15)  | 78(3) | 75(3)  | 52(2) | -25(2) | -38(2) | 45(3)  |
| C(16)  | 35(2) | 74(3)  | 79(3) | -27(2) | -12(2) | 9(2)   |
| C(17)  | 41(2) | 62(2)  | 38(2) | -9(1)  | 7(1)   | 6(2)   |
| Fe(1A) | 30(1) | 34(1)  | 24(1) | 1(1)   | -3(1)  | 0(1)   |
| P(1A)  | 29(1) | 24(1)  | 21(1) | -2(1)  | -4(1)  | 0(1)   |
| Si(1A) | 43(1) | 52(1)  | 23(1) | -1(1)  | -5(1)  | 6(1)   |
| O(1A)  | 70(2) | 86(2)  | 49(2) | 30(2)  | -2(1)  | -18(2) |
| O(2A)  | 63(2) | 29(1)  | 55(2) | -5(1)  | -16(1) | -9(1)  |
| N(1A)  | 26(1) | 38(1)  | 22(1) | -2(1)  | -2(1)  | 3(1)   |
| C(1A)  | 35(1) | 48(2)  | 25(1) | -3(1)  | -6(1)  | -3(1)  |
| C(2A)  | 69(2) | 107(4) | 32(2) | -15(2) | -4(2)  | 30(3)  |
| C(3A)  | 74(3) | 66(3)  | 45(2) | 20(2)  | -5(2)  | 1(2)   |
| C(4A)  | 84(3) | 70(3)  | 50(2) | -6(2)  | -34(2) | -18(2) |
| C(5A)  | 27(1) | 60(2)  | 36(1) | 4(1)   | 0(1)   | 2(1)   |
| C(6A)  | 40(2) | 57(2)  | 57(2) | 7(2)   | -6(2)  | 18(2)  |
| C(7A)  | 41(2) | 57(2)  | 62(2) | 12(2)  | 0(2)   | -5(2)  |
| C(8A)  | 33(1) | 64(2)  | 21(1) | -6(1)  | -5(1)  | 2(2)   |
| C(9A)  | 46(2) | 115(4) | 32(2) | 31(2)  | -2(2)  | -4(2)  |
| C(10A) | 42(2) | 90(4)  | 46(2) | -36(2) | 2(2)   | 6(2)   |
| C(11A) | 37(2) | 61(2)  | 39(2) | 13(1)  | -3(1)  | -8(2)  |
| C(12A) | 33(2) | 31(1)  | 43(2) | 3(1)   | -14(1) | -5(1)  |
| C(13A) | 44(2) | 37(1)  | 45(2) | -3(1)  | 3(1)   | 11(1)  |
| C(14A) | 83(3) | 59(2)  | 33(2) | 14(2)  | 12(2)  | 45(2)  |
| C(15A) | 78(3) | 75(3)  | 52(2) | -25(2) | -38(2) | 45(3)  |
| C(16A) | 35(2) | 74(3)  | 79(3) | -27(2) | -12(2) | 9(2)   |
| C(17A) | 41(2) | 62(2)  | 38(2) | -9(1)  | 7(1)   | 6(2)   |

---

Table 8. Hydrogen coordinates ( $\times 10^4$ ) and isotropic displacement parameters ( $\text{\AA}^2 \times 10^{-3}$ ) for  $[\text{CpFe}(\text{CO})_2(\eta^1\text{-P}(\text{N}^i\text{Pr}_2)=\text{CH}(\text{SiMe}_3))\text{AlCl}_4$  (**9**).

|        | x     | y    | z     | U(eq) |
|--------|-------|------|-------|-------|
| H(1)   | 4026  | 5687 | 8634  | 43    |
| H(2A)  | 862   | 5963 | 10944 | 83    |
| H(2B)  | 1322  | 7220 | 10386 | 83    |
| H(2C)  | 1632  | 6908 | 11751 | 83    |
| H(3A)  | 3945  | 3893 | 10780 | 74    |
| H(3B)  | 2512  | 3849 | 11152 | 74    |
| H(3C)  | 3532  | 4434 | 12037 | 74    |
| H(4A)  | 4414  | 6811 | 11841 | 82    |
| H(4B)  | 4108  | 7685 | 10735 | 82    |
| H(4C)  | 5082  | 6596 | 10594 | 82    |
| H(5)   | 4549  | 5497 | 5437  | 49    |
| H(6A)  | 4962  | 4426 | 7712  | 62    |
| H(6B)  | 5918  | 4413 | 6633  | 62    |
| H(6C)  | 4630  | 3685 | 6523  | 62    |
| H(7A)  | 4529  | 7409 | 6309  | 64    |
| H(7B)  | 5854  | 6753 | 6448  | 64    |
| H(7C)  | 4938  | 6817 | 7557  | 64    |
| H(8)   | 1411  | 5417 | 5449  | 47    |
| H(9A)  | 2401  | 7266 | 4928  | 77    |
| H(9B)  | 2034  | 6492 | 3768  | 77    |
| H(9C)  | 3449  | 6520 | 4242  | 77    |
| H(10A) | 3460  | 4212 | 4362  | 71    |
| H(10B) | 2023  | 4091 | 3973  | 71    |
| H(10C) | 2502  | 3536 | 5216  | 71    |
| H(13)  | 569   | 7754 | 8298  | 50    |
| H(14)  | 271   | 7253 | 6092  | 70    |
| H(15)  | -1527 | 5785 | 5889  | 82    |
| H(16)  | -2322 | 5334 | 7953  | 75    |
| H(17)  | -1059 | 6599 | 9413  | 56    |
| H(1A)  | 1635  | 5917 | 9684  | 43    |

Supplementary Material (ESI) for Chemical Communications  
This journal is © The Royal Society of Chemistry 2005

|        |       |      |       |    |
|--------|-------|------|-------|----|
| H(2A1) | 3723  | 7328 | 11979 | 83 |
| H(2A2) | 2324  | 6854 | 11781 | 83 |
| H(2A3) | 2863  | 7899 | 10943 | 83 |
| H(3A1) | 4522  | 4005 | 10671 | 74 |
| H(3A2) | 3038  | 3948 | 10792 | 74 |
| H(3A3) | 3877  | 4512 | 11847 | 74 |
| H(4A1) | 5556  | 5786 | 9330  | 82 |
| H(4A2) | 5694  | 6647 | 10473 | 82 |
| H(4A3) | 5060  | 7155 | 9272  | 82 |
| H(5A)  | 4254  | 5736 | 8001  | 49 |
| H(6A1) | 5044  | 4077 | 7299  | 62 |
| H(6A2) | 5638  | 4890 | 6271  | 62 |
| H(6A3) | 4333  | 4218 | 6042  | 62 |
| H(7A1) | 5393  | 6701 | 6071  | 64 |
| H(7A2) | 5295  | 7247 | 7388  | 64 |
| H(7A3) | 4206  | 7495 | 6427  | 64 |
| H(8A)  | 1484  | 5625 | 5623  | 47 |
| H(9A1) | 2359  | 7639 | 5535  | 77 |
| H(9A2) | 1864  | 7038 | 4318  | 77 |
| H(9A3) | 3328  | 7079 | 4615  | 77 |
| H(10D) | 3601  | 4994 | 4385  | 71 |
| H(10E) | 2170  | 4677 | 4104  | 71 |
| H(10F) | 2895  | 4006 | 5173  | 71 |
| H(13A) | 139   | 7739 | 7838  | 50 |
| H(14A) | -249  | 6946 | 5703  | 70 |
| H(15A) | -2061 | 5490 | 5807  | 82 |
| H(16A) | -2699 | 5271 | 7936  | 75 |
| H(17A) | -1415 | 6709 | 9155  | 56 |

---

Table 9. Atomic coordinates ( $\times 10^4$ ) and equivalent isotropic displacement parameters ( $\text{\AA}^2 \times 10^3$ ) for  $[\text{Cp}^*\text{W}(\text{CO})_2(\eta^3\text{-P}(\text{N}^i\text{Pr}_2)\text{NN}(\text{CPh})_2)]\text{AlCl}_4$  (**15**).  $U(\text{eq})$  is defined as one third of the trace of the orthogonalized  $U^{ij}$  tensor.

|       | x       | y        | z        | U(eq) |
|-------|---------|----------|----------|-------|
| W(1)  | 3259(1) | -3225(1) | -3315(1) | 21(1) |
| Cl(1) | 8074(1) | -2053(1) | -815(1)  | 43(1) |
| Cl(2) | 7505(1) | -1047(1) | 356(1)   | 55(1) |
| Cl(3) | 5167(1) | -1606(1) | -794(1)  | 59(1) |
| Cl(4) | 6760(1) | -3396(1) | 43(1)    | 48(1) |
| P(1)  | 2228(1) | -1489(1) | -3336(1) | 21(1) |
| Al(1) | 6874(1) | -2036(1) | -302(1)  | 27(1) |
| O(1)  | 5288(2) | -2860(2) | -2226(1) | 33(1) |
| O(2)  | 4802(2) | -1742(1) | -3749(1) | 36(1) |
| N(1)  | 1864(2) | -3010(1) | -2951(1) | 20(1) |
| N(2)  | 1499(2) | -2542(1) | -3476(1) | 21(1) |
| N(3)  | 1980(2) | -993(1)  | -3954(1) | 22(1) |
| C(1)  | 4520(2) | -2971(2) | -2620(1) | 24(1) |
| C(2)  | 4218(2) | -2272(2) | -3589(1) | 26(1) |
| C(3)  | 2424(2) | -4748(2) | -3516(1) | 26(1) |
| C(4)  | 2373(2) | -4327(2) | -4038(1) | 26(1) |
| C(5)  | 3564(2) | -4114(2) | -4056(1) | 30(1) |
| C(6)  | 4357(2) | -4425(2) | -3541(1) | 32(1) |
| C(7)  | 3649(2) | -4814(2) | -3203(1) | 31(1) |
| C(8)  | 1364(3) | -5125(2) | -3348(1) | 37(1) |
| C(9)  | 1255(3) | -4199(2) | -4494(1) | 38(1) |
| C(10) | 3927(3) | -3772(3) | -4558(1) | 47(1) |
| C(11) | 5690(3) | -4466(3) | -3405(2) | 51(1) |
| C(12) | 4097(3) | -5337(2) | -2661(1) | 46(1) |
| C(13) | 1200(2) | -3191(2) | -2619(1) | 21(1) |
| C(14) | 1803(2) | -3709(2) | -2100(1) | 23(1) |
| C(15) | 1311(2) | -4531(2) | -1949(1) | 29(1) |
| C(16) | 1924(3) | -5031(2) | -1481(1) | 39(1) |
| C(17) | 3012(3) | -4708(2) | -1156(1) | 41(1) |
| C(18) | 3487(3) | -3875(2) | -1292(1) | 36(1) |



Supplementary Material (ESI) for Chemical Communications  
This journal is © The Royal Society of Chemistry 2005

|        |          |          |          |       |
|--------|----------|----------|----------|-------|
| C(19)  | 2892(2)  | -3375(2) | -1765(1) | 26(1) |
| C(20)  | -68(2)   | -2926(2) | -2728(1) | 22(1) |
| C(21)  | -541(2)  | -2790(2) | -2272(1) | 25(1) |
| C(22)  | -1726(2) | -2519(2) | -2350(1) | 30(1) |
| C(23)  | -2445(2) | -2397(2) | -2885(1) | 31(1) |
| C(24)  | -1996(2) | -2557(2) | -3344(1) | 30(1) |
| C(25)  | -815(2)  | -2820(2) | -3268(1) | 25(1) |
| C(26)  | 2036(2)  | 62(2)    | -3966(1) | 25(1) |
| C(27)  | 3260(3)  | 423(2)   | -3659(2) | 47(1) |
| C(28)  | 1046(3)  | 502(2)   | -3755(2) | 46(1) |
| C(29)  | 1596(2)  | -1510(2) | -4491(1) | 29(1) |
| C(30)  | 259(3)   | -1442(2) | -4735(1) | 46(1) |
| C(31)  | 2285(3)  | -1193(2) | -4902(1) | 42(1) |
| Cl(1A) | 1111(1)  | -1729(1) | -950(1)  | 52(1) |
| Cl(2A) | 1577(1)  | -875(1)  | -1941(1) | 48(1) |
| C(1A)  | 2028(3)  | -997(4)  | -1214(2) | 63(1) |

---

Table 10. Bond lengths [Å] and angles [°] for [Cp\*W(CO)<sub>2</sub>(η<sup>3</sup>-P(N<sup>i</sup>Pr)<sub>2</sub>)NN(CPh)<sub>2</sub>]AlCl<sub>4</sub> (**15**).

---

|             |            |
|-------------|------------|
| W(1)-C(1)   | 1.981(2)   |
| W(1)-C(2)   | 1.981(3)   |
| W(1)-N(1)   | 2.076(2)   |
| W(1)-N(2)   | 2.2011(19) |
| W(1)-C(6)   | 2.281(3)   |
| W(1)-C(7)   | 2.298(3)   |
| W(1)-C(5)   | 2.333(2)   |
| W(1)-C(3)   | 2.363(2)   |
| W(1)-C(4)   | 2.397(2)   |
| W(1)-P(1)   | 2.7289(9)  |
| Cl(1)-Al(1) | 2.1206(11) |
| Cl(2)-Al(1) | 2.1309(12) |
| Cl(3)-Al(1) | 2.1253(13) |
| Cl(4)-Al(1) | 2.1259(12) |
| P(1)-N(3)   | 1.642(2)   |
| P(1)-N(2)   | 1.704(2)   |
| O(1)-C(1)   | 1.147(3)   |
| O(2)-C(2)   | 1.150(3)   |
| N(1)-C(13)  | 1.294(3)   |
| N(1)-N(2)   | 1.424(3)   |
| N(3)-C(29)  | 1.482(3)   |
| N(3)-C(26)  | 1.497(3)   |
| C(3)-C(4)   | 1.414(4)   |
| C(3)-C(7)   | 1.434(4)   |
| C(3)-C(8)   | 1.498(4)   |
| C(4)-C(5)   | 1.429(3)   |
| C(4)-C(9)   | 1.492(4)   |
| C(5)-C(6)   | 1.435(4)   |
| C(5)-C(10)  | 1.496(4)   |
| C(6)-C(7)   | 1.430(4)   |
| C(6)-C(11)  | 1.498(4)   |
| C(7)-C(12)  | 1.503(4)   |
| C(13)-C(20) | 1.474(3)   |
| C(13)-C(14) | 1.487(3)   |

Supplementary Material (ESI) for Chemical Communications  
This journal is © The Royal Society of Chemistry 2005

|                |            |
|----------------|------------|
| C(14)-C(15)    | 1.391(3)   |
| C(14)-C(19)    | 1.400(4)   |
| C(15)-C(16)    | 1.387(4)   |
| C(16)-C(17)    | 1.386(5)   |
| C(17)-C(18)    | 1.381(5)   |
| C(18)-C(19)    | 1.390(4)   |
| C(20)-C(21)    | 1.396(3)   |
| C(20)-C(25)    | 1.400(3)   |
| C(21)-C(22)    | 1.393(3)   |
| C(22)-C(23)    | 1.382(4)   |
| C(23)-C(24)    | 1.392(4)   |
| C(24)-C(25)    | 1.385(3)   |
| C(26)-C(27)    | 1.514(4)   |
| C(26)-C(28)    | 1.517(4)   |
| C(29)-C(30)    | 1.513(4)   |
| C(29)-C(31)    | 1.523(4)   |
| Cl(1A)-C(1A)   | 1.734(4)   |
| Cl(2A)-C(1A)   | 1.751(4)   |
|                |            |
| C(1)-W(1)-C(2) | 79.75(10)  |
| C(1)-W(1)-N(1) | 94.41(9)   |
| C(2)-W(1)-N(1) | 128.61(9)  |
| C(1)-W(1)-N(2) | 121.11(9)  |
| C(2)-W(1)-N(2) | 102.56(9)  |
| N(1)-W(1)-N(2) | 38.76(7)   |
| C(1)-W(1)-C(6) | 90.95(10)  |
| C(2)-W(1)-C(6) | 91.23(11)  |
| N(1)-W(1)-C(6) | 140.12(9)  |
| N(2)-W(1)-C(6) | 146.65(8)  |
| C(1)-W(1)-C(7) | 89.75(10)  |
| C(2)-W(1)-C(7) | 126.71(10) |
| N(1)-W(1)-C(7) | 104.05(9)  |
| N(2)-W(1)-C(7) | 126.63(9)  |
| C(6)-W(1)-C(7) | 36.40(10)  |
| C(1)-W(1)-C(5) | 123.67(10) |
| C(2)-W(1)-C(5) | 83.12(10)  |

Supplementary Material (ESI) for Chemical Communications  
This journal is © The Royal Society of Chemistry 2005

|                   |            |
|-------------------|------------|
| N(1)-W(1)-C(5)    | 136.16(8)  |
| N(2)-W(1)-C(5)    | 114.89(9)  |
| C(6)-W(1)-C(5)    | 36.21(10)  |
| C(7)-W(1)-C(5)    | 60.05(10)  |
| C(1)-W(1)-C(3)    | 121.21(9)  |
| C(2)-W(1)-C(3)    | 141.77(10) |
| N(1)-W(1)-C(3)    | 84.36(8)   |
| N(2)-W(1)-C(3)    | 93.03(8)   |
| C(6)-W(1)-C(3)    | 59.56(9)   |
| C(7)-W(1)-C(3)    | 35.79(9)   |
| C(5)-W(1)-C(3)    | 58.69(9)   |
| C(1)-W(1)-C(4)    | 147.59(9)  |
| C(2)-W(1)-C(4)    | 110.81(10) |
| N(1)-W(1)-C(4)    | 101.04(8)  |
| N(2)-W(1)-C(4)    | 87.44(8)   |
| C(6)-W(1)-C(4)    | 59.23(9)   |
| C(7)-W(1)-C(4)    | 58.99(9)   |
| C(5)-W(1)-C(4)    | 35.13(8)   |
| C(3)-W(1)-C(4)    | 34.54(9)   |
| C(1)-W(1)-P(1)    | 94.20(7)   |
| C(2)-W(1)-P(1)    | 70.32(7)   |
| N(1)-W(1)-P(1)    | 59.17(6)   |
| N(2)-W(1)-P(1)    | 38.61(5)   |
| C(6)-W(1)-P(1)    | 159.55(8)  |
| C(7)-W(1)-P(1)    | 162.97(7)  |
| C(5)-W(1)-P(1)    | 128.89(7)  |
| C(3)-W(1)-P(1)    | 131.63(6)  |
| C(4)-W(1)-P(1)    | 118.19(6)  |
| N(3)-P(1)-N(2)    | 103.20(10) |
| N(3)-P(1)-W(1)    | 111.78(8)  |
| N(2)-P(1)-W(1)    | 53.70(7)   |
| Cl(1)-Al(1)-Cl(3) | 108.66(5)  |
| Cl(1)-Al(1)-Cl(4) | 110.58(5)  |
| Cl(3)-Al(1)-Cl(4) | 110.08(5)  |
| Cl(1)-Al(1)-Cl(2) | 108.67(5)  |
| Cl(3)-Al(1)-Cl(2) | 109.46(6)  |

Supplementary Material (ESI) for Chemical Communications  
This journal is © The Royal Society of Chemistry 2005

|                   |            |
|-------------------|------------|
| Cl(4)-Al(1)-Cl(2) | 109.36(5)  |
| C(13)-N(1)-N(2)   | 126.28(19) |
| C(13)-N(1)-W(1)   | 155.94(17) |
| N(2)-N(1)-W(1)    | 75.39(11)  |
| N(1)-N(2)-P(1)    | 102.07(14) |
| N(1)-N(2)-W(1)    | 65.85(11)  |
| P(1)-N(2)-W(1)    | 87.69(8)   |
| C(29)-N(3)-C(26)  | 118.56(19) |
| C(29)-N(3)-P(1)   | 124.52(16) |
| C(26)-N(3)-P(1)   | 116.63(15) |
| O(1)-C(1)-W(1)    | 176.3(2)   |
| O(2)-C(2)-W(1)    | 177.7(2)   |
| C(4)-C(3)-C(7)    | 108.7(2)   |
| C(4)-C(3)-C(8)    | 124.5(2)   |
| C(7)-C(3)-C(8)    | 126.7(3)   |
| C(4)-C(3)-W(1)    | 74.03(14)  |
| C(7)-C(3)-W(1)    | 69.62(13)  |
| C(8)-C(3)-W(1)    | 126.03(17) |
| C(3)-C(4)-C(5)    | 108.2(2)   |
| C(3)-C(4)-C(9)    | 124.4(2)   |
| C(5)-C(4)-C(9)    | 127.4(3)   |
| C(3)-C(4)-W(1)    | 71.43(13)  |
| C(5)-C(4)-W(1)    | 70.02(13)  |
| C(9)-C(4)-W(1)    | 127.24(18) |
| C(4)-C(5)-C(6)    | 107.8(2)   |
| C(4)-C(5)-C(10)   | 125.6(3)   |
| C(6)-C(5)-C(10)   | 125.9(3)   |
| C(4)-C(5)-W(1)    | 74.85(14)  |
| C(6)-C(5)-W(1)    | 69.91(14)  |
| C(10)-C(5)-W(1)   | 128.0(2)   |
| C(7)-C(6)-C(5)    | 108.0(2)   |
| C(7)-C(6)-C(11)   | 125.0(3)   |
| C(5)-C(6)-C(11)   | 126.5(3)   |
| C(7)-C(6)-W(1)    | 72.44(14)  |
| C(5)-C(6)-W(1)    | 73.88(14)  |
| C(11)-C(6)-W(1)   | 125.85(19) |

Supplementary Material (ESI) for Chemical Communications  
This journal is © The Royal Society of Chemistry 2005

|                     |            |
|---------------------|------------|
| C(6)-C(7)-C(3)      | 107.4(2)   |
| C(6)-C(7)-C(12)     | 126.7(3)   |
| C(3)-C(7)-C(12)     | 125.3(3)   |
| C(6)-C(7)-W(1)      | 71.16(15)  |
| C(3)-C(7)-W(1)      | 74.58(14)  |
| C(12)-C(7)-W(1)     | 126.92(19) |
| N(1)-C(13)-C(20)    | 124.5(2)   |
| N(1)-C(13)-C(14)    | 115.2(2)   |
| C(20)-C(13)-C(14)   | 120.4(2)   |
| C(15)-C(14)-C(19)   | 119.5(2)   |
| C(15)-C(14)-C(13)   | 120.8(2)   |
| C(19)-C(14)-C(13)   | 119.6(2)   |
| C(16)-C(15)-C(14)   | 119.8(3)   |
| C(15)-C(16)-C(17)   | 120.5(3)   |
| C(18)-C(17)-C(16)   | 120.1(3)   |
| C(17)-C(18)-C(19)   | 120.0(3)   |
| C(18)-C(19)-C(14)   | 120.0(3)   |
| C(21)-C(20)-C(25)   | 119.0(2)   |
| C(21)-C(20)-C(13)   | 118.2(2)   |
| C(25)-C(20)-C(13)   | 122.8(2)   |
| C(22)-C(21)-C(20)   | 120.8(2)   |
| C(23)-C(22)-C(21)   | 119.5(2)   |
| C(22)-C(23)-C(24)   | 120.4(2)   |
| C(25)-C(24)-C(23)   | 120.3(2)   |
| C(24)-C(25)-C(20)   | 120.0(2)   |
| N(3)-C(26)-C(27)    | 111.5(2)   |
| N(3)-C(26)-C(28)    | 111.2(2)   |
| C(27)-C(26)-C(28)   | 112.5(3)   |
| N(3)-C(29)-C(30)    | 111.3(2)   |
| N(3)-C(29)-C(31)    | 111.8(2)   |
| C(30)-C(29)-C(31)   | 112.2(2)   |
| Cl(1A)-C(1A)-Cl(2A) | 113.68(18) |

---

Symmetry transformations used to generate equivalent atoms:

Supplementary Material (ESI) for Chemical Communications  
 This journal is © The Royal Society of Chemistry 2005

Table 11. Anisotropic displacement parameters ( $\text{\AA}^2 \times 10^3$ ) for  $[\text{Cp}^*\text{W}(\text{CO})_2(\eta^3\text{-P}(\text{N}^i\text{Pr}_2)\text{NN}(\text{CPh})_2)]\text{AlCl}_4$

(15). The anisotropic

displacement factor exponent takes the form:  $-2\pi^2[ h^2 a^{*2}U^{11} + \dots + 2 h k a^* b^* U^{12} ]$

|       | $U^{11}$ | $U^{22}$ | $U^{33}$ | $U^{23}$ | $U^{13}$ | $U^{12}$ |
|-------|----------|----------|----------|----------|----------|----------|
| W(1)  | 20(1)    | 20(1)    | 21(1)    | 0(1)     | 5(1)     | 0(1)     |
| Cl(1) | 54(1)    | 34(1)    | 50(1)    | 5(1)     | 32(1)    | 3(1)     |
| Cl(2) | 91(1)    | 39(1)    | 36(1)    | -10(1)   | 18(1)    | -10(1)   |
| Cl(3) | 37(1)    | 58(1)    | 75(1)    | 14(1)    | 3(1)     | 9(1)     |
| Cl(4) | 73(1)    | 31(1)    | 46(1)    | 10(1)    | 24(1)    | -4(1)    |
| P(1)  | 23(1)    | 20(1)    | 18(1)    | 1(1)     | 5(1)     | 1(1)     |
| Al(1) | 34(1)    | 24(1)    | 25(1)    | 2(1)     | 10(1)    | 1(1)     |
| O(1)  | 27(1)    | 39(1)    | 28(1)    | 0(1)     | 1(1)     | -3(1)    |
| O(2)  | 28(1)    | 36(1)    | 46(1)    | 10(1)    | 14(1)    | -2(1)    |
| N(1)  | 21(1)    | 20(1)    | 20(1)    | 2(1)     | 4(1)     | 0(1)     |
| N(2)  | 20(1)    | 22(1)    | 19(1)    | 4(1)     | 4(1)     | -1(1)    |
| N(3)  | 26(1)    | 20(1)    | 18(1)    | 2(1)     | 3(1)     | -1(1)    |
| C(1)  | 24(1)    | 23(1)    | 26(1)    | 1(1)     | 7(1)     | 0(1)     |
| C(2)  | 21(1)    | 27(1)    | 29(1)    | 3(1)     | 6(1)     | 2(1)     |
| C(3)  | 30(1)    | 20(1)    | 29(1)    | -6(1)    | 10(1)    | -3(1)    |
| C(4)  | 28(1)    | 25(1)    | 25(1)    | -7(1)    | 7(1)     | -3(1)    |
| C(5)  | 33(1)    | 29(1)    | 32(1)    | -11(1)   | 15(1)    | -6(1)    |
| C(6)  | 24(1)    | 27(1)    | 44(2)    | -12(1)   | 8(1)     | 2(1)     |
| C(7)  | 33(1)    | 21(1)    | 34(1)    | -3(1)    | 3(1)     | 3(1)     |
| C(8)  | 44(2)    | 28(1)    | 45(2)    | -11(1)   | 23(1)    | -13(1)   |
| C(9)  | 37(1)    | 39(2)    | 32(1)    | -8(1)    | -3(1)    | -2(1)    |
| C(10) | 61(2)    | 50(2)    | 43(2)    | -15(1)   | 34(2)    | -19(2)   |
| C(11) | 25(1)    | 45(2)    | 82(3)    | -28(2)   | 11(1)    | 2(1)     |
| C(12) | 59(2)    | 25(1)    | 45(2)    | 4(1)     | -4(2)    | 5(1)     |
| C(13) | 23(1)    | 18(1)    | 21(1)    | -1(1)    | 7(1)     | -1(1)    |
| C(14) | 27(1)    | 22(1)    | 22(1)    | 2(1)     | 10(1)    | 4(1)     |
| C(15) | 35(1)    | 25(1)    | 31(1)    | 3(1)     | 15(1)    | 0(1)     |
| C(16) | 58(2)    | 28(1)    | 40(2)    | 12(1)    | 27(1)    | 10(1)    |
| C(17) | 50(2)    | 48(2)    | 29(1)    | 15(1)    | 15(1)    | 22(1)    |
| C(18) | 35(1)    | 47(2)    | 24(1)    | 4(1)     | 6(1)     | 12(1)    |

Supplementary Material (ESI) for Chemical Communications  
This journal is © The Royal Society of Chemistry 2005

|        |       |        |       |        |        |        |
|--------|-------|--------|-------|--------|--------|--------|
| C(19)  | 29(1) | 29(1)  | 21(1) | 2(1)   | 8(1)   | 4(1)   |
| C(20)  | 22(1) | 20(1)  | 24(1) | -1(1)  | 7(1)   | -2(1)  |
| C(21)  | 25(1) | 27(1)  | 23(1) | -2(1)  | 7(1)   | -3(1)  |
| C(22)  | 27(1) | 34(1)  | 31(1) | -6(1)  | 12(1)  | -1(1)  |
| C(23)  | 22(1) | 34(1)  | 37(1) | -2(1)  | 8(1)   | 0(1)   |
| C(24)  | 23(1) | 37(1)  | 29(1) | 1(1)   | 4(1)   | -3(1)  |
| C(25)  | 24(1) | 29(1)  | 24(1) | 0(1)   | 7(1)   | -2(1)  |
| C(26)  | 30(1) | 19(1)  | 25(1) | 3(1)   | 6(1)   | -1(1)  |
| C(27)  | 44(2) | 28(1)  | 55(2) | 9(1)   | -12(1) | -11(1) |
| C(28)  | 64(2) | 30(1)  | 55(2) | 8(1)   | 34(2)  | 12(1)  |
| C(29)  | 39(1) | 25(1)  | 19(1) | 1(1)   | 2(1)   | -5(1)  |
| C(30)  | 41(2) | 45(2)  | 40(2) | 5(1)   | -11(1) | -11(1) |
| C(31)  | 68(2) | 37(2)  | 24(1) | -2(1)  | 18(1)  | -7(1)  |
| Cl(1A) | 55(1) | 62(1)  | 31(1) | 1(1)   | 0(1)   | -9(1)  |
| Cl(2A) | 48(1) | 50(1)  | 46(1) | -2(1)  | 10(1)  | -15(1) |
| C(1A)  | 45(2) | 105(3) | 39(2) | -28(2) | 12(1)  | -32(2) |

---



Table 12. Hydrogen coordinates ( $\times 10^4$ ) and isotropic displacement parameters ( $\text{\AA}^2 \times 10^{-3}$ ) for  $[\text{Cp}^*\text{W}(\text{CO})_2(\eta^3\text{-P}(\text{N}^i\text{Pr}_2)\text{NN}(\text{CPh})_2)]\text{AlCl}_4$  (**15**).

|        | x     | y     | z     | U(eq)   |
|--------|-------|-------|-------|---------|
| H(8C)  | 1090  | -5708 | -3555 | 55(11)  |
| H(8B)  | 1585  | -5257 | -2947 | 42(9)   |
| H(8A)  | 721   | -4656 | -3435 | 53(11)  |
| H(9C)  | 639   | -3917 | -4340 | 68(13)  |
| H(9B)  | 1411  | -3782 | -4781 | 88(16)  |
| H(9A)  | 979   | -4814 | -4658 | 58(11)  |
| H(10C) | 3349  | -3303 | -4756 | 110(20) |
| H(10B) | 4720  | -3482 | -4439 | 50(10)  |
| H(10A) | 3949  | -4305 | -4806 | 54(11)  |
| H(11C) | 5943  | -5118 | -3441 | 62(12)  |
| H(11B) | 5972  | -4061 | -3664 | 37(9)   |
| H(11A) | 6030  | -4246 | -3022 | 56(11)  |
| H(12C) | 4904  | -5120 | -2474 | 75(14)  |
| H(12B) | 3566  | -5216 | -2421 | 103(19) |
| H(12A) | 4114  | -6016 | -2736 | 53(11)  |
| H(15)  | 559   | -4750 | -2166 | 32(8)   |
| H(16)  | 1595  | -5599 | -1382 | 41(9)   |
| H(17)  | 3432  | -5061 | -840  | 46(10)  |
| H(18)  | 4220  | -3644 | -1062 | 46(10)  |
| H(19)  | 3223  | -2805 | -1860 | 34(8)   |
| H(21)  | -47   | -2881 | -1905 | 32(8)   |
| H(22)  | -2038 | -2419 | -2037 | 26(7)   |
| H(23)  | -3251 | -2204 | -2940 | 31(8)   |
| H(24)  | -2500 | -2484 | -3711 | 27(7)   |
| H(25)  | -513  | -2930 | -3583 | 17(6)   |
| H(26)  | 1896  | 254   | -4366 | 22(7)   |
| H(27C) | 3863  | 142   | -3821 | 39(9)   |
| H(27B) | 3280  | 1112  | -3693 | 35(8)   |
| H(27A) | 3428  | 248   | -3264 | 73(15)  |
| H(28C) | 1165  | 340   | -3361 | 50(10)  |

Supplementary Material (ESI) for Chemical Communications  
This journal is © The Royal Society of Chemistry 2005

|        |      |       |       |         |
|--------|------|-------|-------|---------|
| H(28B) | 1065 | 1190  | -3796 | 52(11)  |
| H(28A) | 272  | 260   | -3972 | 110(20) |
| H(29)  | 1788 | -2191 | -4408 | 30(8)   |
| H(30C) | 22   | -776  | -4774 | 51(10)  |
| H(30B) | 38   | -1746 | -5102 | 42(10)  |
| H(30A) | -147 | -1759 | -4486 | 63(13)  |
| H(31C) | 3143 | -1241 | -4726 | 53(11)  |
| H(31B) | 2076 | -1598 | -5234 | 69(14)  |
| H(31A) | 2081 | -536  | -5012 | 51(10)  |
| H(1A1) | 2850 | -1252 | -1105 | 76      |
| H(1A2) | 2045 | -364  | -1042 | 76      |

---
